# Supplementary material for: Dissecting the brown adipogenic regulatory network using integrative genomics
Source: PubMed Central journal article supplement (PMC5299609; doi:10.1038/srep42130), 2017-02-09
Supplement: srep42130-s1.pdf [file srep42130-s1.pdf]

## **Dissecting the brown adipogenic regulatory network using integrative genomics**

Rachana N. Pradhan<sup>1,2</sup>, Johannes J. Bues<sup>1,2</sup>, Vincent Gardeux<sup>1,2</sup>, Petra C. Schwalie<sup>1,2</sup>, Daniel Alpern<sup>1,2</sup>, Wanze Chen<sup>1,2</sup>, Julie Russeil<sup>1,2</sup>, Sunil K. Raghav<sup>3</sup>, Bart Deplancke<sup>1,2,\*</sup>

<sup>1</sup>Institute of Bioengineering, École Polytechnique Fédérale de Lausanne (EPFL), CH-1015 Lausanne, Switzerland

<sup>2</sup>Swiss Institute of Bioinformatics, CH-1015 Lausanne, Switzerland

<sup>3</sup>ILS Bhubhaneshwar, Orissa, India

\*To whom correspondence should be addressed: [bart.deplancke@epfl.ch](mailto:bart.deplancke@epfl.ch)

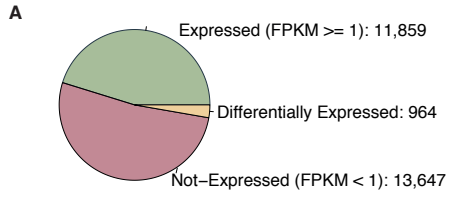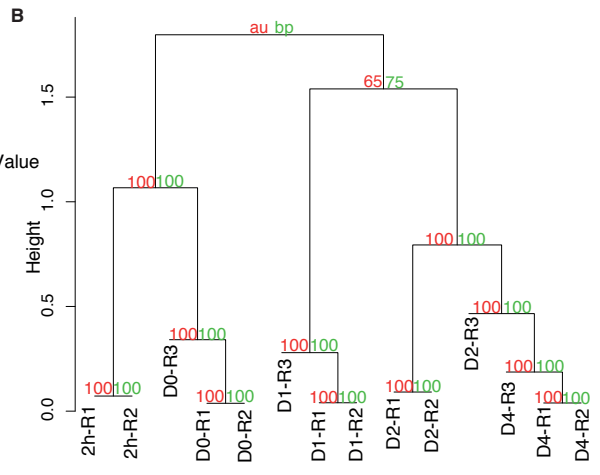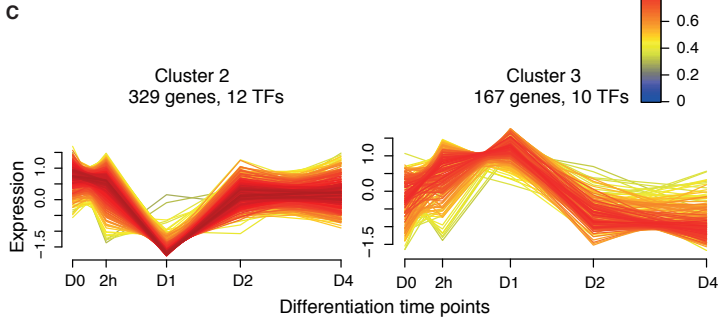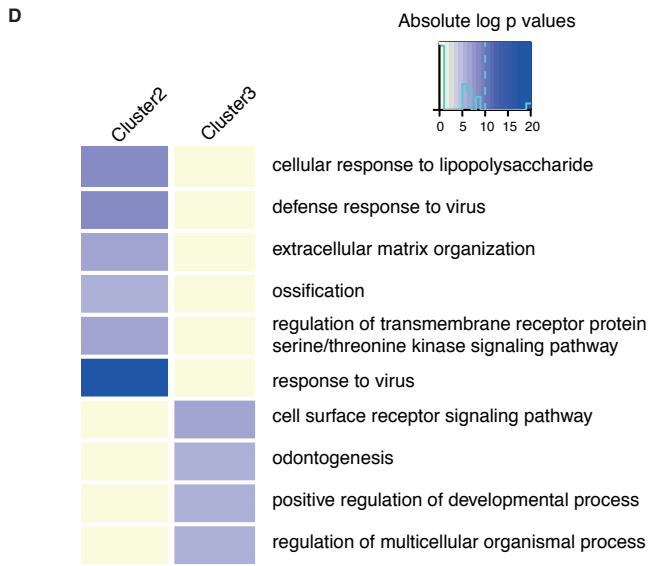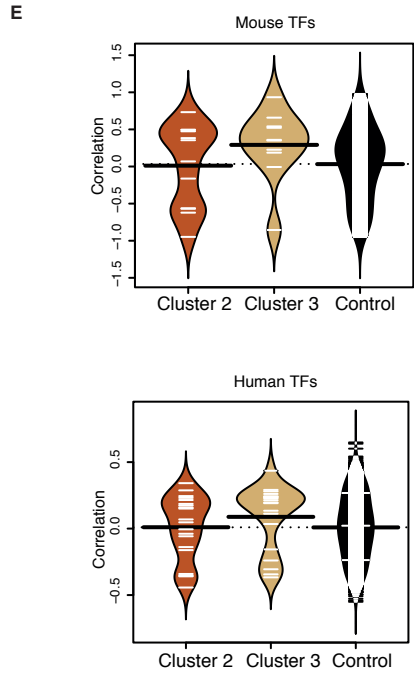

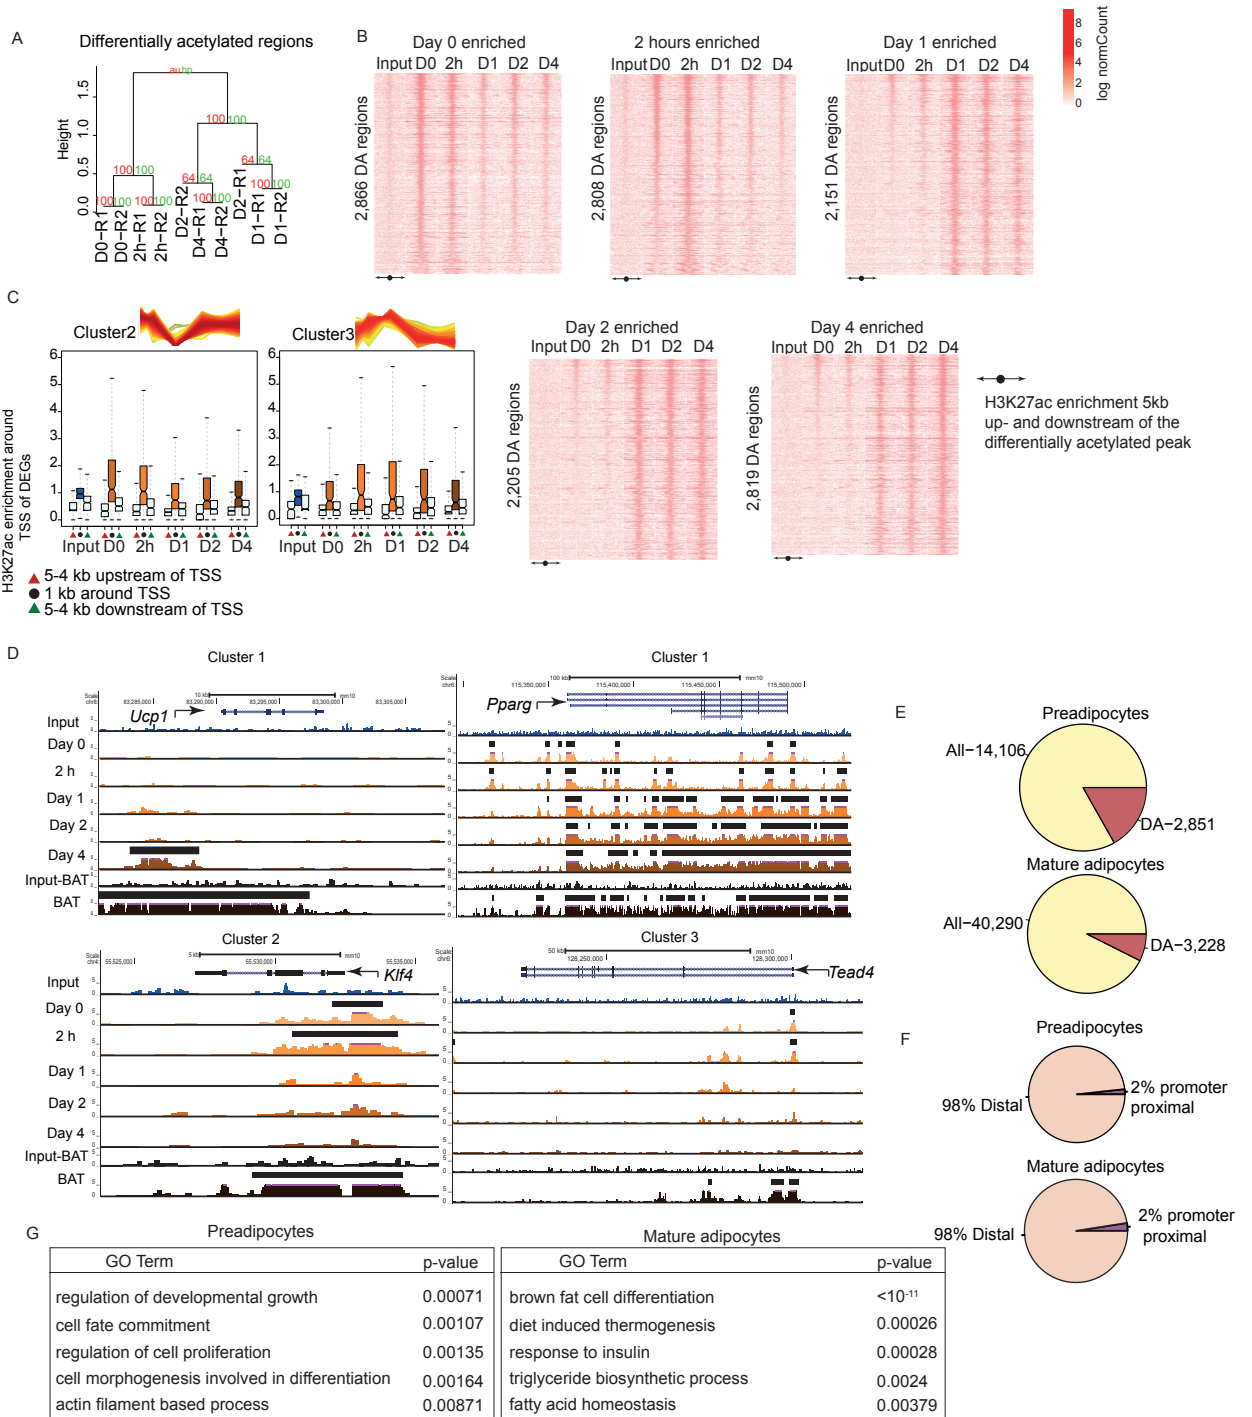

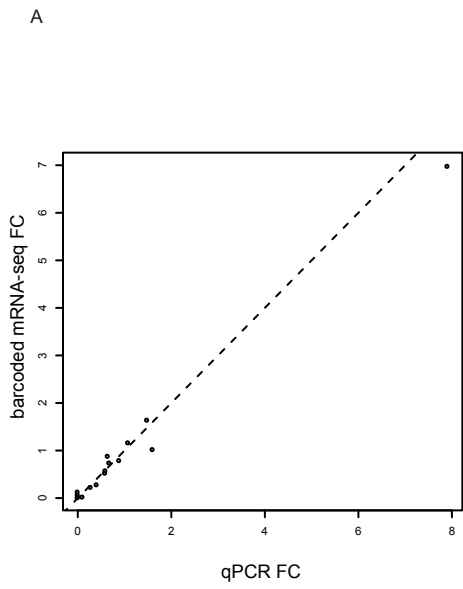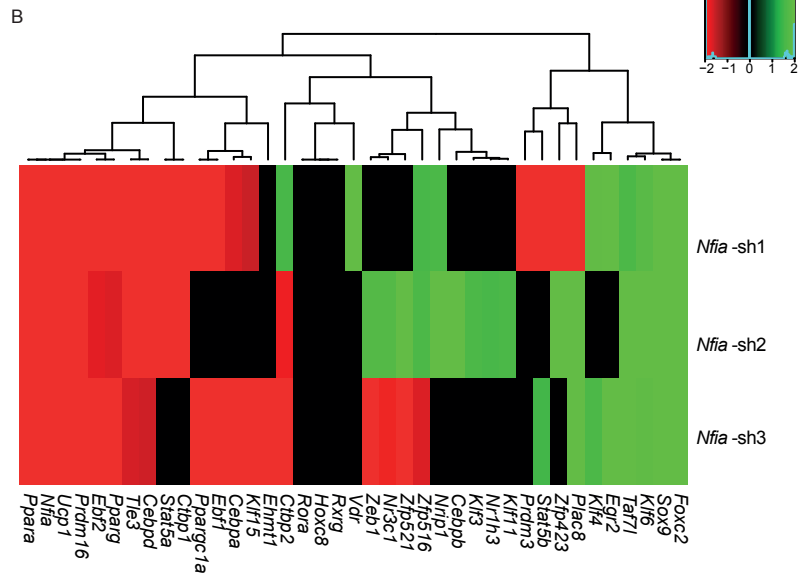

**C**

| Preadipocytes |       |       | Mature adipocytes |                |       |
|---------------|-------|-------|-------------------|----------------|-------|
| SeqLogo       | Motif | q-val | SeqLogo           | Motif          | q-val |
|               | BATF  | 0     |                   | PPAR $\gamma$  | 0     |
|               | FOSL1 | 0     |                   | EBF            | 0     |
|               | JUN   | 0     |                   | C/EBP $\beta$  | 0     |
|               | ATF3  | 0     |                   | RXR            | 0     |
|               | TEAD4 | 0     |                   | C/EBP $\alpha$ | 0     |

A

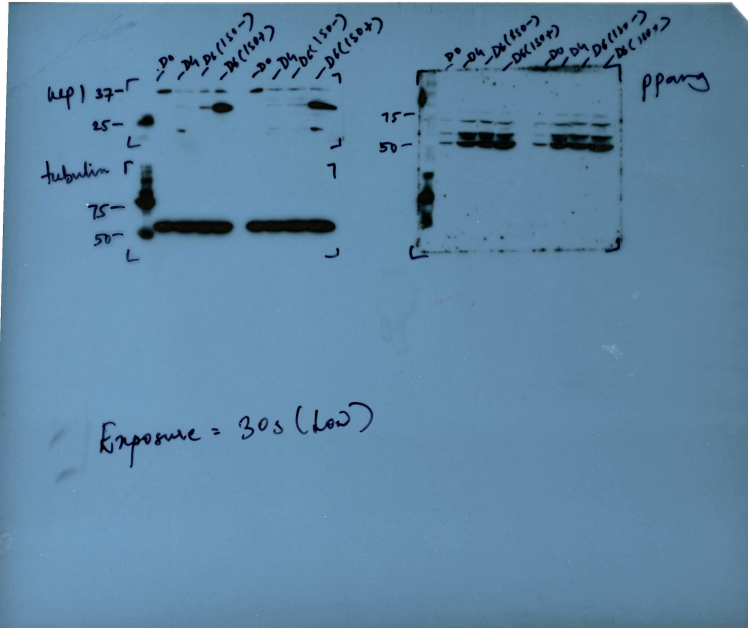

B

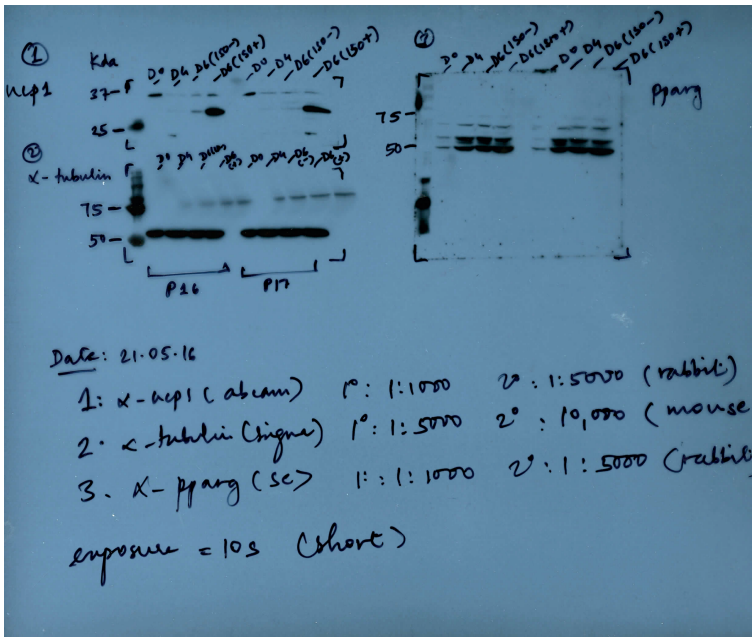

**TF-Cluster 1**

| <b>Ensembl_gene_id</b> | <b>MEM.SHIP</b> | <b>Gene</b> | <b>Family</b>            |
|------------------------|-----------------|-------------|--------------------------|
| ENSMUSG00000000440     | 0.938396902     | Pparg       | PPAR receptor            |
| ENSMUSG00000000942     | 0.894532083     | Hoxa4       | Homeobox                 |
| ENSMUSG00000002108     | 0.916626508     | Nr1h3       | Ecdystd receptor         |
| ENSMUSG00000003051     | 0.879524411     | Elf3        | ETS                      |
| ENSMUSG00000004043     | 0.771996741     | Stat5a      | STAT                     |
| ENSMUSG00000005373     | 0.908177075     | Mlxip1      | bHLH                     |
| ENSMUSG00000015843     | 0.909453196     | Rxrg        | Thyroid hormone receptor |
| ENSMUSG00000018554     | 0.928143338     | Ybx2        | CSD                      |
| ENSMUSG00000020538     | 0.880969352     | Srebf1      | bHLH                     |
| ENSMUSG00000021356     | 0.593390474     | Irf4        | IRF                      |
| ENSMUSG00000022383     | 0.895487998     | Ppara       | PPAR receptor            |
| ENSMUSG00000022508     | 0.550584671     | Bcl6        | ZBTB                     |
| ENSMUSG00000022987     | 0.501336804     | Zfp641      | zf-C2H2                  |
| ENSMUSG00000028150     | 0.662219695     | Rorc        | Thyroid hormone receptor |
| ENSMUSG00000028565     | 0.580531709     | Nfia        | CTF/NFI                  |
| ENSMUSG00000030087     | 0.813929276     | Klf15       | zf-C2H2                  |
| ENSMUSG00000034957     | 0.726919853     | Cebpa       | C/EBP                    |
| ENSMUSG00000039087     | 0.801841035     | Rreb1       | zf-C2H2                  |
| ENSMUSG00000045333     | 0.920065379     | Zfp423      | zf-C2H2                  |
| ENSMUSG00000046470     | 0.59210733      | Sox18       | HMG                      |
| ENSMUSG00000059824     | 0.5899506       | Dbp         | TF_bZIP                  |
| ENSMUSG00000066687     | 0.498157771     | Zbtb16      | ZBTB                     |
| ENSMUSG00000067929     | 0.332985651     | Gm10226     | zf-C2H2                  |
| ENSMUSG00000068551     | 0.766965764     | Zfp467      | zf-C2H2                  |

**TF-Cluster 2**

| <b>Ensembl_gene_id</b> | <b>MEM.SHIP</b> | <b>Gene</b> | <b>Family</b> |
|------------------------|-----------------|-------------|---------------|
| ENSMUSG00000002325     | 0.822872592     | Irf9        | IRF           |
| ENSMUSG00000003032     | 0.4720978       | Klf4        | zf-C2H2       |
| ENSMUSG00000015709     | 0.928617603     | Arnt2       | bHLH          |
| ENSMUSG00000017724     | 0.553709959     | Etv4        | ETS           |
| ENSMUSG00000020679     | 0.390572502     | Hnf1b       | Homeobox      |
| ENSMUSG00000025498     | 0.793876317     | Irf7        | IRF           |
| ENSMUSG00000027230     | 0.731720781     | Creb3l1     | TF_bZIP       |
| ENSMUSG00000028358     | 0.862699381     | Zfp618      | zf-C2H2       |
| ENSMUSG00000036036     | 0.759188029     | Zfp57       | zf-C2H2       |
| ENSMUSG00000040270     | 0.742078525     | Bach2       | TF_bZIP       |
| ENSMUSG00000043903     | 0.602917746     | Gm22        | zf-C2H2       |
| ENSMUSG00000071064     | 0.642167681     | Zfp827      | zf-C2H2       |
| ENSMUSG00000074622     | 0.28731178      | Mafb        | TF_bZIP       |

**TF-Cluster 3**

| <b>Ensembl_gene_id</b> | <b>MEM.SHIP</b> | <b>Gene</b> | <b>Family</b> |
|------------------------|-----------------|-------------|---------------|
| ENSMUSG00000001497     | 0.640669816     | Pax9        | PAX           |
| ENSMUSG00000001510     | 0.461887017     | Dlx3        | Homeobox      |
| ENSMUSG000000022346    | 0.592230335     | Myc         | bHLH          |
| ENSMUSG000000024912    | 0.474488038     | Fosl1       | TF_bZIP       |
| ENSMUSG000000030353    | 0.550976621     | Tead4       | TEA           |
| ENSMUSG000000031431    | 0.599520078     | Tsc22d3     | TSC22         |
| ENSMUSG000000036192    | 0.583887933     | Rorb        | ROR receptor  |
| ENSMUSG000000042821    | 0.781413925     | Snai1       | zf-C2H2       |
| ENSMUSG000000056501    | 0.441546917     | Cebpb       | C/EBP         |
| ENSMUSG000000070691    | 0.706162643     | Runx3       | Runt          |



#### TF-Cluster 4

| Ensembl_gene_id    | MEM.SHIP    | Gene    | Family                   |
|--------------------|-------------|---------|--------------------------|
| ENSMUSG00000005148 | 0.495339769 | Klf5    | zf-C2H2                  |
| ENSMUSG00000007805 | 0.896954558 | Twist2  | bHLH                     |
| ENSMUSG00000015053 | 0.662582032 | Gata2   | zf-GATA                  |
| ENSMUSG00000020644 | 0.621877604 | Id2     | bHLH                     |
| ENSMUSG00000021379 | 0.459644584 | Id4     | bHLH                     |
| ENSMUSG00000022479 | 0.921474684 | Vdr     | Thyroid hormone receptor |
| ENSMUSG00000022500 | 0.831513713 | Litaf   | zf-LITAF-like            |
| ENSMUSG00000022895 | 0.879759352 | Ets2    | ETS                      |
| ENSMUSG00000022952 | 0.443317539 | Runx1   | Runt                     |
| ENSMUSG00000023034 | 0.660611281 | Nr4a1   | Nuclear orphan receptor  |
| ENSMUSG00000023391 | 0.649215479 | Dlx2    | Homeobox                 |
| ENSMUSG00000025880 | 0.714194505 | Smad7   | MH1                      |
| ENSMUSG00000026628 | 0.45434623  | Atf3    | TF_bZIP                  |
| ENSMUSG00000026630 | 0.548848944 | Batf3   | TF_bZIP                  |
| ENSMUSG00000026826 | 0.914638161 | Nr4a2   | Nuclear orphan receptor  |
| ENSMUSG00000028023 | 0.385606084 | Pitx2   | Homeobox                 |
| ENSMUSG00000028341 | 0.918208636 | Nr4a3   | Nuclear orphan receptor  |
| ENSMUSG00000029135 | 0.925841733 | Fosl2   | TF_bZIP                  |
| ENSMUSG00000030067 | 0.719916363 | Foxp1   | Fork head                |
| ENSMUSG00000031734 | 0.778356028 | Irx3    | Homeobox                 |
| ENSMUSG00000031737 | 0.585923635 | Irx5    | Homeobox                 |
| ENSMUSG00000034161 | 0.448687108 | Scx     | bHLH                     |
| ENSMUSG00000034762 | 0.781042023 | Glis1   | zf-C2H2                  |
| ENSMUSG00000037868 | 0.577717425 | Egr2    | zf-C2H2                  |
| ENSMUSG00000038402 | 0.877802201 | Foxf2   | Fork head                |
| ENSMUSG00000038518 | 0.387291987 | Jarid2  | ARID                     |
| ENSMUSG00000038648 | 0.913481444 | Creb3l2 | TF_bZIP                  |
| ENSMUSG00000041911 | 0.672869879 | Dlx1    | Homeobox                 |
| ENSMUSG00000042622 | 0.83916131  | Maff    | TF_bZIP                  |
| ENSMUSG00000042812 | 0.925026361 | Foxf1a  | Fork head                |
| ENSMUSG00000046714 | 0.754994464 | Foxc2   | Fork head                |
| ENSMUSG00000051341 | 0.782004205 | Zfp52   | zf-C2H2                  |
| ENSMUSG00000052040 | 0.415575526 | Klf13   | zf-C2H2                  |
| ENSMUSG00000052837 | 0.645118303 | Junb    | TF_bZIP                  |
| ENSMUSG00000056592 | 0.501481298 | Zfp658  | zf-C2H2                  |
| ENSMUSG00000056749 | 0.506637855 | Nfil3   | TF_bZIP                  |
| ENSMUSG00000056758 | 0.61663579  | Hmga2   | HMG1/HMGY                |
| ENSMUSG00000063889 | 0.80210794  | Crem    | TF_bZIP                  |
| ENSMUSG00000070643 | 0.747506056 | Sox13   | HMG                      |
| ENSMUSG00000078302 | 0.753054892 | Foxd1   | Fork head                |

## Supplementary Table 2

### **Motif Name (size 1000)-Preadipocytes**

JUN\_MOUSE.H10MO.A  
JUND\_MOUSE.H10MO.A  
Atf3(bZIP)/GBM-ATF3-ChIP-Seq(GSE33912)/Homer  
BATF(bZIP)/Th17-BATF-ChIP-Seq(GSE39756)/Homer  
FOSL1\_MOUSE.H10MO.C  
FOSL2\_MOUSE.H10MO.A  
AP-1(bZIP)/ThioMac-PU.1-ChIP-Seq(GSE21512)/Homer  
Jun-AP1(bZIP)/K562-cJun-ChIP-Seq(GSE31477)/Homer  
BATF\_MOUSE.H10MO.B  
JUNB\_MOUSE.H10MO.B  
SMRC1\_MOUSE.H10MO.B  
FOSB\_MOUSE.H10MO.C  
Bach2(bZIP)/OCILy7-Bach2-ChIP-Seq(GSE44420)/Homer  
TEAD4(TEA)/Tropoblast-Tead4-ChIP-Seq(GSE37350)/Homer  
TEAD(TEA)/Fibroblast-PU.1-ChIP-Seq(Unpublished)/Homer  
NFE2\_MOUSE.H10MO.A  
MAFK\_MOUSE.H10MO.S  
BACH1\_MOUSE.H10MO.C  
NF2L2\_MOUSE.H10MO.D  
NF-E2(bZIP)/K562-NFE2-ChIP-Seq(GSE31477)/Homer  
Bach1(bZIP)/K562-Bach1-ChIP-Seq(GSE31477)/Homer  
Nrf2(bZIP)/Lymphoblast-Nrf2-ChIP-Seq(GSE37589)/Homer  
Mef2c(MADS)/GM12878-Mef2c-ChIP-Seq(GSE32465)/Homer  
TEAD1\_MOUSE.H10MO.D  
MEF2D\_MOUSE.H10MO.C  
MafK(bZIP)/C2C12-MafK-ChIP-Seq(GSE36030)/Homer  
Ets1-distal(ETS)/CD4+-PolII-ChIP-Seq(Barski et al.)/Homer  
RUNX1(Runt)/Jurkat-RUNX1-ChIP-Seq(GSE29180)/Homer  
COE1\_MOUSE.H10MO.C  
FEV\_MOUSE.H10MO.C  
RUNX1\_MOUSE.H10MO.B  
MAFG\_MOUSE.H10MO.D  
MEF2A\_MOUSE.H10MO.B  
Stat3(Stat)/mES-Stat3-ChIP-Seq(GSE11431)/Homer  
ERG(ETS)/VCaP-ERG-ChIP-Seq(GSE14097)/Homer  
RUNX(Runt)/HPC7-Runx1-ChIP-Seq(GSE22178)/Homer  
EBF(EBF)/proBcell-EBF-ChIP-Seq(GSE21978)/Homer  
NF1:FOXA1/LNCAP-FOXA1-ChIP-Seq(GSE27824)/Homer  
EBF1(EBF)/Near-E2A-ChIP-Seq(GSE21512)/Homer  
NFIA\_MOUSE.H10MO.C  
RUNX-AML(Runt)/CD4+-PolII-ChIP-Seq(Barski et al.)/Homer  
NF1-halbsite(CTF)/LNCaP-NF1-ChIP-Seq(Unpublished)/Homer  
ELK1\_MOUSE.H10MO.B

EWS:ERG-fusion(ETS)/CADO\_ES1-EWS:ERG-ChIP-Seq(SRA014231)/Homer  
EWS:FLI1-fusion(ETS)/SK\_N\_MC-EWS:FLI1-ChIP-Seq(SRA014231)/Homer  
SPDEF(ETS)/VCaP-SPDEF-ChIP-Seq(SRA014231)/Homer  
Mef2a(MADS)/HL1-Mef2a.biotin-ChIP-Seq(GSE21529)/Homer  
PEBB\_MOUSE.H10MO.C  
ETS1(ETS)/Jurkat-ETS1-ChIP-Seq(GSE17954)/Homer  
Fli1(ETS)/CD8-FLI-ChIP-Seq(GSE20898)/Homer  
ETS1\_MOUSE.H10MO.B  
ETV1(ETS)/GIST48-ETV1-ChIP-Seq(GSE22441)/Homer  
RUNX2\_MOUSE.H10MO.B  
RUNX2(Runt)/PCa-RUNX2-ChIP-Seq(GSE33889)/Homer  
ELF1\_MOUSE.H10MO.B  
STA5A\_MOUSE.H10MO.A  
MEF2C\_MOUSE.H10MO.B  
Tlx?(NR)/NPC-H3K4me1-ChIP-Seq(GSE16256)/Homer  
GABPA(ETS)/Jurkat-GABPa-ChIP-Seq(GSE17954)/Homer  
ETV4\_MOUSE.H10MO.B  
NFIA\_MOUSE.H10MO.S  
FLI1\_MOUSE.H10MO.A  
GABP1\_MOUSE.H10MO.C  
TEAD4\_MOUSE.H10MO.D  
STA5B\_MOUSE.H10MO.C  
Atf4(bZIP)/MEF-Atf4-ChIP-Seq(GSE35681)/Homer  
MAFK\_MOUSE.H10MO.A  
NF1(CTF)/LNCAP-NF1-ChIP-Seq(Unpublished)/Homer  
MITF\_MOUSE.H10MO.C  
ERG\_MOUSE.H10MO.A  
USF2\_MOUSE.H10MO.A  
NFAC1\_MOUSE.H10MO.A  
STAT4(Stat)/CD4-Stat4-ChIP-Seq(GSE22104)/Homer  
Chop(bZIP)/MEF-Chop-ChIP-Seq(GSE35681)/Homer  
STAT3\_MOUSE.H10MO.B  
NFAC1\_MOUSE.H10MO.S  
EHF(ETS)/LoVo-EHF-ChIP-Seq(GSE49402)/Homer  
NFAT:AP1/Jurkat-NFATC1-ChIP-Seq(Jolma et al.)/Homer  
NFkB-p65-Rel(RHD)/LPS-exp(GSE23622)/Homer  
NF2L1\_MOUSE.H10MO.C  
STAT5(Stat)/mCD4+-Stat5-ChIP-Seq(GSE12346)/Homer  
Usf2(HLH)/C2C12-Usf2-ChIP-Seq(GSE36030)/Homer  
Fox:Ebox(Forkhead:HLH)/Panc1-Foxa2-ChIP-Seq(GSE47459)/Homer  
CEBPD\_MOUSE.H10MO.B  
CEBPB\_MOUSE.H10MO.A  
EHF\_MOUSE.H10MO.A  
HOXA9(Homeobox)/HSC-Hoxa9-ChIP-Seq(GSE33509)/Homer  
Bcl6(Zf)/Liver-Bcl6-ChIP-Seq(GSE31578)/Homer  
MafA(bZIP)/Islet-MafA-ChIP-Seq(GSE30298)/Homer

STAT1(Stat)/HelaS3-STAT1-ChIP-Seq(GSE12782)/Homer  
USF1(HLH)/GM12878-Usf1-ChIP-Seq(GSE32465)/Homer  
CEBPA\_MOUSE.H10MO.B  
Smad3(MAD)/NPC-Smad3-ChIP-Seq(GSE36673)/Homer  
STAT4\_MOUSE.H10MO.A  
Smad4(MAD)/ESC-SMAD4-ChIP-Seq(GSE29422)/Homer  
USF1\_MOUSE.H10MO.A  
IRF2\_MOUSE.H10MO.C  
Elk4(ETS)/Hela-Elk4-ChIP-Seq(GSE31477)/Homer  
NFAC4\_MOUSE.H10MO.C  
CEBP:AP1(bZIP)/ThioMac-CEBPb-ChIP-Seq(GSE21512)/Homer  
STAT6/Macrophage-Stat6-ChIP-Seq(GSE38377)/Homer  
GABPA\_MOUSE.H10MO.A  
AP-2gamma(AP2)/MCF7-TFAP2C-ChIP-Seq(GSE21234)/Homer  
Stat3+il21(Stat)/CD4-Stat3-ChIP-Seq(GSE19198)/Homer  
Pdx1(Homeobox)/Islet-Pdx1-ChIP-Seq(SRA008281)/Homer  
Ap4(HLH)/AML-Tfap4-ChIP-Seq(GSE45738)/Homer  
ELF1(ETS)/Jurkat-ELF1-ChIP-Seq(SRA014231)/Homer  
Elk1(ETS)/Hela-Elk1-ChIP-Seq(GSE31477)/Homer  
FOXP2\_MOUSE.H10MO.A  
Hoxc9(Homeobox)/Ainv15-Hoxc9-ChIP-Seq(GSE21812)/Homer  
IRF7\_MOUSE.H10MO.C  
ESR2\_MOUSE.H10MO.S  
STAT6(Stat)/CD4-Stat6-ChIP-Seq(GSE22104)/Homer  
DBP\_MOUSE.H10MO.B  
KLF8\_MOUSE.H10MO.C  
SP1\_MOUSE.H10MO.S  
STAT6\_MOUSE.H10MO.C  
TF65\_MOUSE.H10MO.S  
ATF3\_MOUSE.H10MO.A  
NFkB-p65(RHD)/GM12787-p65-ChIP-Seq(GSE19485)/Homer  
PHA-4(Forkhead)/cElegans-Embryos-PHA4-ChIP-Seq(modEncode)/Homer  
FOXA1(Forkhead)/LNCAP-FOXA1-ChIP-Seq(GSE27824)/Homer  
BCL6\_MOUSE.H10MO.C  
HRE(HSF)/Striatum-HSF1-ChIP-Seq(GSE38000)/Homer  
ELK4\_MOUSE.H10MO.B  
ETS(ETS)/Promoter/Homer  
E2F6\_MOUSE.H10MO.A  
FOS\_MOUSE.H10MO.A  
RELB\_MOUSE.H10MO.C  
ELF5(ETS)/T47D-ELF5-ChIP-Seq(GSE30407)/Homer  
  
ZN143\_MOUSE.H10MO.D  
SCL(HLH)/HPC7-ScI-ChIP-Seq(GSE13511)/Homer  
MYF6\_MOUSE.H10MO.C  
ATF2\_MOUSE.H10MO.B

MyoD(HLH)/Myotube-MyoD-ChIP-Seq(GSE21614)/Homer  
FOXA1(Forkhead)/MCF7-FOXA1-ChIP-Seq(GSE26831)/Homer  
NFAT5\_MOUSE.H10MO.D  
AARE(HLH)/mES-cMyc-ChIP-Seq/Homer  
NFAC3\_MOUSE.H10MO.B  
BMYB(HTH)/Hela-BMYB-ChIPSeq(GSE27030)/Homer  
EVX1\_MOUSE.H10MO.C  
Cbf1(bHLH)/Yeast-Cbf1-ChIP-Seq(GSE29506)/Homer  
p53(p53)/mES-cMyc-ChIP-Seq(GSE11431)/Homer  
FOXA1\_MOUSE.H10MO.B  
E-box/Drosophila-Promoters/Homer  
ELF2\_MOUSE.H10MO.C  
Rfx1(HTH)/NPC-H3K4me1-ChIP-Seq(GSE16256)/Homer  
GFI1\_MOUSE.H10MO.C

TF65\_MOUSE.H10MO.C  
NR1D1\_MOUSE.H10MO.D  
Foxa2(Forkhead)/Liver-Foxa2-ChIP-Seq(GSE25694)/Homer  
REL\_MOUSE.H10MO.C  
Atoh1(bHLH)/Cerebellum-Atoh1-ChIP-Seq(GSE22111)/Homer  
STAT2\_MOUSE.H10MO.B  
Rbpj1(?)/Panc1-Rbpj1-ChIP-Seq(GSE47459)/Homer  
THB\_MOUSE.H10MO.S  
MAX\_MOUSE.H10MO.A  
CDX4\_MOUSE.H10MO.A  
Gfi1b(Zf)/HPC7-Gfi1b-ChIP-Seq(GSE22178)/Homer  
OLIG2\_MOUSE.H10MO.B  
Reverb(NR/DR2)/BLRP(RAW)-Reverba-ChIP-Seq(GSE45914)/Homer  
KLF4\_MOUSE.H10MO.C  
PU.1(ETS)/ThioMac-PU.1-ChIP-Seq(GSE21512)/Homer  
ZBT18\_MOUSE.H10MO.D  
c-Jun-CRE(bZIP)/K562-cJun-ChIP-Seq(GSE31477)/Homer  
Arnt:Ahr(bHLH)/MCF7-Arnt-ChIP-Seq(Lo et al.)/Homer  
PAX2\_MOUSE.H10MO.D  
Nur77(NR)/K562-NR4A1-ChIP-Seq(GSE31363)/Homer  
FOXP1(Forkhead)/H9-FOXP1-ChIP-Seq(GSE31006)/Homer  
PIF5ox(bHLH)/Arabidopsis-PIF5ox-ChIP-Seq(GSE35062)/Homer  
TFE3\_MOUSE.H10MO.C  
IRF3\_MOUSE.H10MO.C  
Foxh1(Forkhead)/hESC-FOXH1-ChIP-Seq(GSE29422)/Homer  
FOXC1\_MOUSE.H10MO.C  
Tcf12(HLH)/GM12878-Tcf12-ChIP-Seq(GSE32465)/Homer  
Hoxb4(Homeobox)/ES-Hoxb4-ChIP-Seq(GSE34014)/Homer  
FOXD1\_MOUSE.H10MO.D  
E2F4\_MOUSE.H10MO.C  
AP2C\_MOUSE.H10MO.A

X-box(HTH)/NPC-H3K4me1-ChIP-Seq(GSE16256)/Homer  
BMAL1\_MOUSE.H10MO.C  
FOXJ2\_MOUSE.H10MO.C  
RFX2\_MOUSE.H10MO.C  
FOXA2\_MOUSE.H10MO.B  
HLTF\_MOUSE.H10MO.D  
AP2A\_MOUSE.H10MO.A  
RFX(HTH)/K562-RFX3-ChIP-Seq(SRA012198)/Homer  
ELF3\_MOUSE.H10MO.D  
CEBPG\_MOUSE.H10MO.C  
PAX5\_MOUSE.H10MO.S  
EGR4\_MOUSE.H10MO.D  
HNF4G\_MOUSE.H10MO.C  
Smad2(MAD)/ES-SMAD2-ChIP-Seq(GSE29422)/Homer  
GFI1B\_MOUSE.H10MO.C  
NFAT(RHD)/Jurkat-NFATC1-ChIP-Seq(Jolma et al.)/Homer  
LIN-39(Homeobox)/cElegans.L3-LIN39-ChIP-Seq(modEncode)/Homer  
Maz(Zf)/HepG2-Maz-ChIP-Seq(GSE31477)/Homer  
IRF8\_MOUSE.H10MO.D  
HSF1\_MOUSE.H10MO.A  
ELF5\_MOUSE.H10MO.D  
MAFB\_MOUSE.H10MO.D  
XBP1\_MOUSE.H10MO.C  
ZN148\_MOUSE.H10MO.D  
Unknown4/Drosophila-Promoters/Homer  
MEIS1\_MOUSE.H10MO.C  
Pitx1(Homeobox)/Chicken-Pitx1-ChIP-Seq(GSE38910)/Homer

RFX1\_MOUSE.H10MO.C  
HAND1\_MOUSE.H10MO.D  
Unknown-ESC-element/mES-Nanog-ChIP-Seq(GSE11724)/Homer  
Rfx2(HTH)/LoVo-RFX2-ChIP-Seq(GSE49402)/Homer  
PAX5-shortForm(Paired/Homeobox)/GM12878-PAX5-ChIP-Seq(GSE32465)/Homer  
RXRB\_MOUSE.H10MO.C  
ETV5\_MOUSE.H10MO.D  
NFIL3\_MOUSE.H10MO.C  
SP1\_MOUSE.H10MO.A

| Consensus        | P-value   | Log P-value | q-value (Benjamini) |
|------------------|-----------|-------------|---------------------|
| MTGAGTCAY        | 1e-313    | -7.23E+02   | 0                   |
| GATGAGTCATC      | 1.00E-300 | -6.93E+02   | 0                   |
| DATGASTCATHN     | 1.00E-287 | -6.62E+02   | 0                   |
| DATGASTCAT       | 1.00E-279 | -6.43E+02   | 0                   |
| DRTGACTCAYN      | 1.00E-278 | -6.41E+02   | 0                   |
| GGATGAGTCAY      | 1.00E-276 | -6.38E+02   | 0                   |
| VTGACTCATC       | 1.00E-267 | -6.16E+02   | 0                   |
| GATGASTCATCN     | 1.00E-266 | -6.13E+02   | 0                   |
| MTGAGTCATW       | 1.00E-255 | -5.89E+02   | 0                   |
| DVTGAGTCAK       | 1.00E-240 | -5.54E+02   | 0                   |
| VTGAGTCAB        | 1.00E-212 | -4.89E+02   | 0                   |
| GATGAGTCAG       | 1.00E-144 | -3.33E+02   | 0                   |
| TGCTGAGTCA       | 1.00E-107 | -2.47E+02   | 0                   |
| CCWGGAAATGY      | 1.00E-98  | -2.27E+02   | 0                   |
| YCWGGAAATGY      | 1.00E-91  | -2.10E+02   | 0                   |
| RSVATGACTCAGCA   | 1.00E-62  | -1.43E+02   | 0                   |
| TGCTGAGTCA       | 1.00E-59  | -1.37E+02   | 0                   |
| TGCTGAGTCAYGGT   | 1.00E-49  | -1.13E+02   | 0                   |
| VRTGACTCAGCA     | 1.00E-48  | -1.12E+02   | 0                   |
| GATGACTCAGCA     | 1.00E-40  | -9.26E+01   | 0                   |
| AWWNTGCTGAGTCAT  | 1.00E-38  | -8.89E+01   | 0                   |
| HTGCTGAGTCAT     | 1.00E-35  | -8.10E+01   | 0                   |
| DCYAAAAATAGM     | 1.00E-25  | -5.98E+01   | 0                   |
| CACATTCCWGMKCH   | 1.00E-25  | -5.80E+01   | 0                   |
| GCTATTTTTAGV     | 1.00E-21  | -4.87E+01   | 0                   |
| GCTGASTCAGCA     | 1.00E-20  | -4.83E+01   | 0                   |
| MACAGGAAGT       | 1.00E-20  | -4.75E+01   | 0                   |
| AAACCACARM       | 1.00E-19  | -4.57E+01   | 0                   |
| GTCCCTGGGGASY    | 1.00E-19  | -4.41E+01   | 0                   |
| CAGGAARTDA       | 1.00E-18  | -4.36E+01   | 0                   |
| TYTGTGGTTA       | 1.00E-18  | -4.22E+01   | 0                   |
| AGTCATK          | 1.00E-17  | -4.05E+01   | 0                   |
| RDKCTATTTWTAGM   | 1.00E-17  | -3.98E+01   | 0                   |
| CTTCCGGGAA       | 1.00E-17  | -3.98E+01   | 0                   |
| ACAGGAAGTG       | 1.00E-16  | -3.89E+01   | 0                   |
| SAAACCACAG       | 1.00E-16  | -3.89E+01   | 0                   |
| DGTCCCYRGGGA     | 1.00E-16  | -3.88E+01   | 0                   |
| WNTGTTTRYTTTGGCA | 1.00E-16  | -3.86E+01   | 0                   |
| GTCCCCWGGGGA     | 1.00E-15  | -3.64E+01   | 0                   |
| TTGGCANGNTGCCAR  | 1.00E-15  | -3.62E+01   | 0                   |
| GCTGTGGTTW       | 1.00E-15  | -3.51E+01   | 0                   |
| YTGCCAAG         | 1.00E-14  | -3.34E+01   | 0                   |
| RCCGGAAGT        | 1.00E-13  | -3.20E+01   | 0                   |

|                     |          |           |   |
|---------------------|----------|-----------|---|
| ATTCCTGTN           | 1.00E-13 | -3.16E+01 | 0 |
| VACAGGAAAT          | 1.00E-13 | -3.13E+01 | 0 |
| ASWTCCTGBT          | 1.00E-13 | -3.10E+01 | 0 |
| CYAAAAATAG          | 1.00E-13 | -3.02E+01 | 0 |
| TYTGTGGTYWB         | 1.00E-12 | -2.94E+01 | 0 |
| ACAGGAAGTG          | 1.00E-12 | -2.83E+01 | 0 |
| NRYTTCCGGH          | 1.00E-12 | -2.80E+01 | 0 |
| ACAGGAAGT           | 1.00E-12 | -2.80E+01 | 0 |
| AACCGGAAGT          | 1.00E-12 | -2.80E+01 | 0 |
| YTGTGGTTD GK        | 1.00E-12 | -2.77E+01 | 0 |
| NWAACCACADNN        | 1.00E-12 | -2.76E+01 | 0 |
| VCMGGAAGTG          | 1.00E-11 | -2.75E+01 | 0 |
| WTTTCTTGGAAT        | 1.00E-11 | -2.72E+01 | 0 |
| TKCTAWAAATAGM       | 1.00E-11 | -2.68E+01 | 0 |
| CTGGCAGSCTGCCA      | 1.00E-11 | -2.66E+01 | 0 |
| RACCGGAAGT          | 1.00E-11 | -2.61E+01 | 0 |
| SAGGAAGT            | 1.00E-11 | -2.58E+01 | 0 |
| MTTGGCA             | 1.00E-11 | -2.55E+01 | 0 |
| SVRACCGGAAGTGGS     | 1.00E-10 | -2.53E+01 | 0 |
| CCGGAAGTGV          | 1.00E-10 | -2.51E+01 | 0 |
| AAAATAKCYCT         | 1.00E-10 | -2.49E+01 | 0 |
| RTTTCTKRGAA         | 1.00E-10 | -2.46E+01 | 0 |
| MTGATGCAAT          | 1.00E-10 | -2.46E+01 | 0 |
| AAAWNTGCTGASTCAGCA  | 1.00E-10 | -2.43E+01 | 0 |
| CYTGGCABNSTGCCAR    | 1.00E-10 | -2.41E+01 | 0 |
| RTCATGTGMB          | 1.00E-10 | -2.41E+01 | 0 |
| ACCGGAARTCC         | 1.00E-10 | -2.39E+01 | 0 |
| GGTCACGTGRCSS       | 1.00E-10 | -2.38E+01 | 0 |
| CAATGGAAAWTT        | 1.00E-10 | -2.37E+01 | 0 |
| NYTTCCWGAAR         | 1.00E-10 | -2.31E+01 | 0 |
| ATTGCATCAT          | 1.00E-09 | -2.29E+01 | 0 |
| YCTCATTCCCGKAA      | 1.00E-09 | -2.28E+01 | 0 |
| TGGAAAWTTCCAT       | 1.00E-09 | -2.28E+01 | 0 |
| AVCAGGAAGT          | 1.00E-09 | -2.24E+01 | 0 |
| SARTGGAAAARTGAGTCAB | 1.00E-09 | -2.21E+01 | 0 |
| GGAAATTCCC          | 1.00E-09 | -2.18E+01 | 0 |
| NATGACT             | 1.00E-09 | -2.13E+01 | 0 |
| RTTTCTNAGAAA        | 1.00E-09 | -2.09E+01 | 0 |
| GTCACGTGGT          | 1.00E-09 | -2.09E+01 | 0 |
| NNNVCTGWGYAAACASN   | 1.00E-08 | -2.03E+01 | 0 |
| RRTRBGCAAT          | 1.00E-08 | -2.00E+01 | 0 |
| KATTGCAYAAT         | 1.00E-08 | -1.98E+01 | 0 |
| MAACCGGAAGTA        | 1.00E-08 | -1.93E+01 | 0 |
| GGCCATAAATCA        | 1.00E-08 | -1.93E+01 | 0 |
| NNNCTTTCCAGGAAA     | 1.00E-08 | -1.91E+01 | 0 |
| TGCTGACTCA          | 1.00E-07 | -1.83E+01 | 0 |



|                       |          |           |        |
|-----------------------|----------|-----------|--------|
| NATTTCCNGGAAAT        | 1.00E-07 | -1.81E+01 | 0      |
| SGTCACGTGR            | 1.00E-07 | -1.78E+01 | 0      |
| TATTKTGCAATA          | 1.00E-07 | -1.78E+01 | 0      |
| TWGTCTGV              | 1.00E-07 | -1.75E+01 | 0      |
| TTCCYGGGAAR           | 1.00E-07 | -1.72E+01 | 0      |
| VBSYGTCTGG            | 1.00E-07 | -1.71E+01 | 0      |
| GGTCACGTGR            | 1.00E-07 | -1.69E+01 | 0      |
| SGAAAGTGAAAGYR        | 1.00E-07 | -1.65E+01 | 0      |
| NRYTTCCGGY            | 1.00E-07 | -1.65E+01 | 0      |
| AGGAAAAYTW            | 1.00E-06 | -1.57E+01 | 0      |
| DRTGTTGCAA            | 1.00E-06 | -1.54E+01 | 0      |
| TTCCKNAGAA            | 1.00E-06 | -1.51E+01 | 0      |
| GVRCCGGAAGTV          | 1.00E-06 | -1.51E+01 | 0      |
| SCCTSAGGSCAW          | 1.00E-06 | -1.51E+01 | 0      |
| SVYTTCCNGGAARB        | 1.00E-06 | -1.50E+01 | 0      |
| YCATYAATCA            | 1.00E-06 | -1.49E+01 | 0      |
| NAHCAGCTGD            | 1.00E-06 | -1.47E+01 | 0      |
| AVCCGGAAGT            | 1.00E-06 | -1.47E+01 | 0      |
| HACTTCCGGY            | 1.00E-06 | -1.44E+01 | 0      |
| BTGTTTACW             | 1.00E-06 | -1.40E+01 | 0      |
| GGCCATAAATCA          | 1.00E-05 | -1.32E+01 | 0      |
| GAAASYGAAA            | 1.00E-05 | -1.31E+01 | 0      |
| AGGTCAS               | 1.00E-05 | -1.30E+01 | 0      |
| ABTTCYRRGAA           | 1.00E-05 | -1.28E+01 | 0      |
| RTTATGYAABM           | 1.00E-05 | -1.27E+01 | 0      |
| CAGGGGGTG             | 1.00E-05 | -1.23E+01 | 0      |
| GGGGGCGGGGC           | 1.00E-05 | -1.23E+01 | 0      |
| ABTTCCTGAGAA          | 1.00E-05 | -1.19E+01 | 0      |
| GGGAATTTCCC           | 1.00E-05 | -1.18E+01 | 0      |
| GTGACGYMA             | 1.00E-05 | -1.16E+01 | 0.0001 |
| WGGGGATTTCCC          | 1.00E-05 | -1.16E+01 | 0.0001 |
| KTGTTTGC              | 1.00E-05 | -1.15E+01 | 0.0001 |
| WAAGTAAACA            | 1.00E-04 | -1.15E+01 | 0.0001 |
| WTTCCTRGAAAGC         | 1.00E-04 | -1.15E+01 | 0.0001 |
| TTCTAGAABNTTCTA       | 1.00E-04 | -1.13E+01 | 0.0001 |
| VACCGGAAGTV           | 1.00E-04 | -1.13E+01 | 0.0001 |
| AACCGGAAGT            | 1.00E-04 | -1.12E+01 | 0.0001 |
| NGGGCGGGAAGG          | 1.00E-04 | -1.08E+01 | 0.0001 |
| YTCTGATTGGYY          | 1.00E-04 | -1.08E+01 | 0.0001 |
| GGGGMTTTTCCM          | 1.00E-04 | -1.06E+01 | 0.0001 |
| ACVAGGAAGT            | 1.00E-04 | -1.06E+01 | 0.0001 |
| GCRWKGKATKMTGGGAADTVY |          |           |        |
| H                     | 1.00E-04 | -1.06E+01 | 0.0001 |
| AVCAGCTG              | 1.00E-04 | -1.04E+01 | 0.0002 |
| GCAGSTG               | 1.00E-04 | -1.03E+01 | 0.0002 |
| VTGACGTCA             | 1.00E-04 | -1.02E+01 | 0.0002 |

|                       |          |           |        |
|-----------------------|----------|-----------|--------|
| RRCAGCTGYTSY          | 1.00E-04 | -1.02E+01 | 0.0002 |
| WAAGTAAACA            | 1.00E-04 | -1.02E+01 | 0.0002 |
| GTGGAAAANTCCMTK       | 1.00E-04 | -1.01E+01 | 0.0002 |
| GATTGCATCA            | 1.00E-04 | -1.01E+01 | 0.0002 |
| TGGAAAAMT             | 1.00E-04 | -1.01E+01 | 0.0002 |
| NHAACBGYYV            | 1.00E-04 | -1.00E+01 | 0.0002 |
| TGATTTATGGCYT         | 1.00E-04 | -9.92E+00 | 0.0003 |
| TCACGTGAYH            | 1.00E-04 | -9.73E+00 | 0.0003 |
| ACATGCCCGGGCAT        | 1.00E-04 | -9.61E+00 | 0.0003 |
| TGTTTRCTYWG           | 1.00E-04 | -9.38E+00 | 0.0004 |
| AACAGCTGTTHN          | 1.00E-04 | -9.31E+00 | 0.0005 |
| TRNCAGGAAGTRRV        | 1.00E-04 | -9.27E+00 | 0.0005 |
| KGTTGCCATGGCAA        | 1.00E-04 | -9.25E+00 | 0.0005 |
| GCWGTGATTT            | 1.00E-03 | -9.05E+00 | 0.0006 |
| GGAAWTTCCMNDATDCNHAAY | 1.00E-03 | -9.02E+00 | 0.0006 |
| ARGDVMVWAGGTCAGDGGG   | 1.00E-03 | -8.97E+00 | 0.0006 |
| CYTGTTTACWYW          | 1.00E-03 | -8.97E+00 | 0.0006 |
| DGGGGNTTCCM           | 1.00E-03 | -8.77E+00 | 0.0007 |
| VNRVCAGCTGGY          | 1.00E-03 | -8.71E+00 | 0.0008 |
| TCAGTTTCNKTTTCC       | 1.00E-03 | -8.69E+00 | 0.0008 |
| HTTCCASG              | 1.00E-03 | -8.67E+00 | 0.0008 |
| SGTCAGGTCA            | 1.00E-03 | -8.60E+00 | 0.0009 |
| GASCACGTGGC           | 1.00E-03 | -8.58E+00 | 0.0009 |
| TGATTTATGGCY          | 1.00E-03 | -8.56E+00 | 0.0009 |
| MAATCACTGC            | 1.00E-03 | -8.53E+00 | 0.0009 |
| RCCAGCTGBTNNCHGSCTGS  | 1.00E-03 | -8.42E+00 | 0.001  |
| GTRGGTCASTGGGTCA      | 1.00E-03 | -8.40E+00 | 0.001  |
| WGGGYGKGGCCS          | 1.00E-03 | -8.39E+00 | 0.001  |
| AGAGGAAGTG            | 1.00E-03 | -8.36E+00 | 0.001  |
| TCCAGATGTTYSSS        | 1.00E-03 | -8.26E+00 | 0.0012 |
| ATGACGTCATCY          | 1.00E-03 | -8.25E+00 | 0.0012 |
| TBGCACGCAA            | 1.00E-03 | -8.19E+00 | 0.0012 |
| GHTCAGTCATGCGTGACA    | 1.00E-03 | -8.16E+00 | 0.0013 |
| TGACCTTNCNT           | 1.00E-03 | -8.14E+00 | 0.0013 |
| NYYTGTTTACHN          | 1.00E-03 | -8.13E+00 | 0.0013 |
| BCACGTGVDN            | 1.00E-03 | -8.09E+00 | 0.0013 |
| RGTCAYGTGR            | 1.00E-03 | -8.07E+00 | 0.0013 |
| GGAAAGYGAAACBRRAA     | 1.00E-03 | -8.05E+00 | 0.0014 |
| NNTGTGGATTSS          | 1.00E-03 | -8.01E+00 | 0.0014 |
| CDTTGTTTACTTAAG       | 1.00E-03 | -8.01E+00 | 0.0014 |
| VCAGCTGYTG            | 1.00E-03 | -7.99E+00 | 0.0014 |
| TGATTRATGGCY          | 1.00E-03 | -7.78E+00 | 0.0017 |
| CWWTGTTTACHTAAG       | 1.00E-03 | -7.74E+00 | 0.0018 |
| GDGGGCGGGAAR          | 1.00E-03 | -7.74E+00 | 0.0018 |
| GCCTGRGGC             | 1.00E-03 | -7.71E+00 | 0.0018 |

|                       |          |           |        |
|-----------------------|----------|-----------|--------|
| GGTTGCCATGGCAA        | 1.00E-03 | -7.68E+00 | 0.0019 |
| KGRACACGTGACYC        | 1.00E-03 | -7.44E+00 | 0.0024 |
| TGTTTTRTTTW           | 1.00E-03 | -7.40E+00 | 0.0024 |
| DGTTGCYAGGSAA         | 1.00E-03 | -7.40E+00 | 0.0024 |
| TTGTTTACWTWG          | 1.00E-03 | -7.38E+00 | 0.0025 |
| KANGGCTGSAAM          | 1.00E-03 | -7.30E+00 | 0.0027 |
| GCCTGRGGC             | 1.00E-03 | -7.22E+00 | 0.0029 |
| CGGTTGCCATGGCAAC      | 1.00E-03 | -7.18E+00 | 0.003  |
| GGSAAACAGGAARY        | 1.00E-03 | -7.18E+00 | 0.003  |
| ATTKTGCAATCTB         | 1.00E-03 | -7.13E+00 | 0.0031 |
| GGCTGAGG              | 1.00E-03 | -7.07E+00 | 0.0033 |
| GGSGGCRGGGC           | 1.00E-03 | -7.05E+00 | 0.0033 |
| GGCCAAAGTCCA          | 1.00E-03 | -7.01E+00 | 0.0034 |
| CTGTCTGG              | 1.00E-03 | -7.00E+00 | 0.0034 |
| GCTGWGATTTV           | 1.00E-03 | -6.95E+00 | 0.0036 |
| ATTTTCCATT            | 1.00E-03 | -6.94E+00 | 0.0036 |
| ATGATTRATG            | 1.00E-03 | -6.91E+00 | 0.0037 |
| GGGGGGGG              | 1.00E-02 | -6.90E+00 | 0.0037 |
| GRGRAAVTGAAASYR       | 1.00E-02 | -6.62E+00 | 0.0049 |
| RGAANVTTCYAGAA        | 1.00E-02 | -6.51E+00 | 0.0055 |
| AHAAGGAARTA           | 1.00E-02 | -6.50E+00 | 0.0055 |
| TGCTGACDS             | 1.00E-02 | -6.48E+00 | 0.0056 |
| GACGTGKCMTTW          | 1.00E-02 | -6.46E+00 | 0.0056 |
| GGGGKGGGGGAGGGG       | 1.00E-02 | -6.46E+00 | 0.0056 |
| AAAATACCRMA           | 1.00E-02 | -6.44E+00 | 0.0057 |
| TGACAGYTTTAHG         | 1.00E-02 | -6.28E+00 | 0.0067 |
| TAATCCCN              | 1.00E-02 | -6.21E+00 | 0.0071 |
| SCSSCSGTTGCCAKGGCRACG |          |           |        |
| G                     | 1.00E-02 | -6.09E+00 | 0.008  |
| GBGTCTGGMWTT          | 1.00E-02 | -6.02E+00 | 0.0085 |
| CACAGCAGGGGG          | 1.00E-02 | -6.00E+00 | 0.0086 |
| GTTGCCATGGCAACM       | 1.00E-02 | -5.99E+00 | 0.0087 |
| GTCACGCTCSCTGM        | 1.00E-02 | -5.93E+00 | 0.0092 |
| TSAGGTCACR            | 1.00E-02 | -5.88E+00 | 0.0096 |
| GHCAGGAAGWAAY         | 1.00E-02 | -5.87E+00 | 0.0097 |
| GTTAYGTAAYKYMK        | 1.00E-02 | -5.83E+00 | 0.01   |
| GGGRRGGGGGCGGGGCCRG   | 1.00E-02 | -5.80E+00 | 0.0103 |

| # of Target Sequences with Motif(of 2851) | % of Target Sequences with Motif |
|-------------------------------------------|----------------------------------|
| 1521                                      | 53.35%                           |
| 1495                                      | 52.44%                           |
| 1667                                      | 58.47%                           |
| 1664                                      | 58.37%                           |
| 1515                                      | 53.14%                           |
| 1439                                      | 50.47%                           |
| 1732                                      | 60.75%                           |
| 925                                       | 32.44%                           |
| 1505                                      | 52.79%                           |
| 1526                                      | 53.53%                           |
| 1465                                      | 51.39%                           |
| 1284                                      | 45.04%                           |
| 572                                       | 20.06%                           |
| 1550                                      | 54.37%                           |
| 1368                                      | 47.98%                           |
| 1121                                      | 39.32%                           |
| 960                                       | 33.67%                           |
| 943                                       | 33.08%                           |
| 1040                                      | 36.48%                           |
| 200                                       | 7.02%                            |
| 186                                       | 6.52%                            |
| 168                                       | 5.89%                            |
| 826                                       | 28.97%                           |
| 1001                                      | 35.11%                           |
| 964                                       | 33.81%                           |
| 466                                       | 16.35%                           |
| 583                                       | 20.45%                           |
| 1506                                      | 52.82%                           |
| 1005                                      | 35.25%                           |
| 1064                                      | 37.32%                           |
| 933                                       | 32.73%                           |
| 541                                       | 18.98%                           |
| 1059                                      | 37.14%                           |
| 773                                       | 27.11%                           |
| 1856                                      | 65.10%                           |
| 1121                                      | 39.32%                           |
| 352                                       | 12.35%                           |
| 149                                       | 5.23%                            |
| 1208                                      | 42.37%                           |
| 822                                       | 28.83%                           |
| 1111                                      | 38.97%                           |
| 1835                                      | 64.36%                           |
| 410                                       | 14.38%                           |

|      |        |
|------|--------|
| 1117 | 39.18% |
| 841  | 29.50% |
| 1368 | 47.98% |
| 704  | 24.69% |
| 1002 | 35.15% |
| 1344 | 47.14% |
| 1299 | 45.56% |
| 1025 | 35.95% |
| 1617 | 56.72% |
| 1109 | 38.90% |
| 1275 | 44.72% |
| 878  | 30.80% |
| 1203 | 42.20% |
| 812  | 28.48% |
| 623  | 21.85% |
| 1134 | 39.78% |
| 1161 | 40.72% |
| 617  | 21.64% |
| 731  | 25.64% |
| 585  | 20.52% |
| 1128 | 39.57% |
| 1130 | 39.64% |
| 428  | 15.01% |
| 928  | 32.55% |
| 524  | 18.38% |
| 829  | 29.08% |
| 477  | 16.73% |
| 482  | 16.91% |
| 1050 | 36.83% |
| 1325 | 46.47% |
| 347  | 12.17% |
| 1077 | 37.78% |
| 761  | 26.69% |
| 1621 | 56.86% |
| 331  | 11.61% |
| 116  | 4.07%  |
| 558  | 19.57% |
| 611  | 21.43% |
| 449  | 15.75% |
| 1450 | 50.86% |
| 528  | 18.52% |
| 464  | 16.27% |
| 1066 | 37.39% |
| 1011 | 35.46% |
| 1764 | 61.87% |
| 1080 | 37.88% |

|      |        |
|------|--------|
| 526  | 18.45% |
| 567  | 19.89% |
| 775  | 27.18% |
| 2487 | 87.23% |
| 1234 | 43.28% |
| 1774 | 62.22% |
| 501  | 17.57% |
| 1215 | 42.62% |
| 586  | 20.55% |
| 1248 | 43.77% |
| 1000 | 35.08% |
| 831  | 29.15% |
| 607  | 21.29% |
| 967  | 33.92% |
| 987  | 34.62% |
| 1322 | 46.37% |
| 1358 | 47.63% |
| 565  | 19.82% |
| 585  | 20.52% |
| 942  | 33.04% |
| 783  | 27.46% |
| 1267 | 44.44% |
| 459  | 16.10% |
| 809  | 28.38% |
| 535  | 18.77% |
| 738  | 25.89% |
| 1209 | 42.41% |
| 1077 | 37.78% |
| 661  | 23.18% |
| 446  | 15.64% |
| 669  | 23.47% |
| 2642 | 92.67% |
| 1662 | 58.30% |
| 1146 | 40.20% |
| 380  | 13.33% |
| 347  | 12.17% |
| 388  | 13.61% |
| 821  | 28.80% |
| 684  | 23.99% |
| 641  | 22.48% |
| 1011 | 35.46% |
| 890  | 31.22% |
| 2721 | 95.44% |
| 647  | 22.69% |
| 361  | 12.66% |

|      |        |
|------|--------|
| 832  | 29.18% |
| 1467 | 51.46% |
| 801  | 28.10% |
| 138  | 4.84%  |
| 1022 | 35.85% |
| 1629 | 57.14% |
| 897  | 31.46% |
| 329  | 11.54% |
| 34   | 1.19%  |
| 1434 | 50.30% |
| 346  | 12.14% |
| 1104 | 38.72% |
| 292  | 10.24% |
| 815  | 28.59% |
| 819  | 28.73% |
| 1270 | 44.55% |
| 1144 | 40.13% |
| 668  | 23.43% |
| 1288 | 45.18% |
| 1809 | 63.45% |
| 1626 | 57.03% |
| 722  | 25.32% |
| 345  | 12.10% |
| 843  | 29.57% |
| 855  | 29.99% |
| 1002 | 35.15% |
| 196  | 6.87%  |
| 865  | 30.34% |
| 737  | 25.85% |
| 818  | 28.69% |
| 377  | 13.22% |
| 659  | 23.11% |
| 415  | 14.56% |
| 293  | 10.28% |
| 678  | 23.78% |
| 1281 | 44.93% |
| 669  | 23.47% |
| 1584 | 55.56% |
| 857  | 30.06% |
| 995  | 34.90% |
| 997  | 34.97% |
| 315  | 11.05% |
| 882  | 30.94% |
| 640  | 22.45% |
| 673  | 23.61% |

|      |        |
|------|--------|
| 173  | 6.07%  |
| 367  | 12.87% |
| 1555 | 54.54% |
| 612  | 21.47% |
| 1255 | 44.02% |
| 937  | 32.87% |
| 555  | 19.47% |
| 111  | 3.89%  |
| 1155 | 40.51% |
| 608  | 21.33% |
| 1023 | 35.88% |
| 893  | 31.32% |
| 790  | 27.71% |
| 1696 | 59.49% |
| 865  | 30.34% |
| 1215 | 42.62% |
| 1529 | 53.63% |
| 1175 | 41.21% |
| 1461 | 51.25% |
| 997  | 34.97% |
| 978  | 34.30% |
| 720  | 25.25% |
| 165  | 5.79%  |
| 1406 | 49.32% |
| 205  | 7.19%  |
| 770  | 27.01% |
| 2753 | 96.56% |
| 444  | 15.57% |
| 827  | 29.01% |
| 672  | 23.57% |
| 123  | 4.31%  |
| 128  | 4.49%  |
| 865  | 30.34% |
| 883  | 30.97% |
| 357  | 12.52% |
| 1314 | 46.09% |



| # of Background Sequences with Motif(of<br>47159) | % of Background Sequences with<br>Motif |
|---------------------------------------------------|-----------------------------------------|
| 9893.9                                            | 20.98%                                  |
| 9825.2                                            | 20.83%                                  |
| 12345.5                                           | 26.18%                                  |
| 12501.5                                           | 26.51%                                  |
| 10548                                             | 22.37%                                  |
| 9618.1                                            | 20.39%                                  |
| 13734.4                                           | 29.12%                                  |
| 4262.5                                            | 9.04%                                   |
| 10910.9                                           | 23.14%                                  |
| 11547.2                                           | 24.49%                                  |
| 11440.8                                           | 24.26%                                  |
| 10918                                             | 23.15%                                  |
| 3418.4                                            | 7.25%                                   |
| 16488.6                                           | 34.96%                                  |
| 14064.1                                           | 29.82%                                  |
| 11815.5                                           | 25.05%                                  |
| 9673.8                                            | 20.51%                                  |
| 9949.3                                            | 21.10%                                  |
| 11369.3                                           | 24.11%                                  |
| 1104.9                                            | 2.34%                                   |
| 1005.5                                            | 2.13%                                   |
| 902.4                                             | 1.91%                                   |
| 9695.8                                            | 20.56%                                  |
| 12359.3                                           | 26.21%                                  |
| 12142.7                                           | 25.75%                                  |
| 4948.4                                            | 10.49%                                  |
| 6589.6                                            | 13.97%                                  |
| 20839.8                                           | 44.19%                                  |
| 12958.6                                           | 27.48%                                  |
| 13890.3                                           | 29.45%                                  |
| 11934.6                                           | 25.31%                                  |
| 6217.9                                            | 13.18%                                  |
| 13979.7                                           | 29.64%                                  |
| 9620.8                                            | 20.40%                                  |
| 27029.2                                           | 57.31%                                  |
| 14992.5                                           | 31.79%                                  |
| 3663.1                                            | 7.77%                                   |
| 1142.3                                            | 2.42%                                   |
| 16485.1                                           | 34.96%                                  |
| 10501.5                                           | 22.27%                                  |
| 15019.5                                           | 31.85%                                  |
| 26968.7                                           | 57.19%                                  |
| 4649                                              | 9.86%                                   |

|         |        |
|---------|--------|
| 15290.1 | 32.42% |
| 11012.5 | 23.35% |
| 19345.9 | 41.02% |
| 8990.1  | 19.06% |
| 13601.5 | 28.84% |
| 19109.5 | 40.52% |
| 18399.8 | 39.02% |
| 14036.6 | 29.76% |
| 23617.3 | 50.08% |
| 15380.5 | 32.61% |
| 18035.2 | 38.24% |
| 11771.3 | 24.96% |
| 16903.6 | 35.84% |
| 10790.4 | 22.88% |
| 7940.4  | 16.84% |
| 15865.6 | 33.64% |
| 16319.8 | 34.61% |
| 7902.9  | 16.76% |
| 9630.6  | 20.42% |
| 7442.4  | 15.78% |
| 15844.8 | 33.60% |
| 15894.7 | 33.70% |
| 5166    | 10.95% |
| 12725.6 | 26.98% |
| 6583.4  | 13.96% |
| 11199.5 | 23.75% |
| 5903.1  | 12.52% |
| 5982    | 12.68% |
| 14681   | 31.13% |
| 19126.9 | 40.56% |
| 4074.7  | 8.64%  |
| 15161.6 | 32.15% |
| 10222.9 | 21.68% |
| 24043.6 | 50.98% |
| 3877.9  | 8.22%  |
| 1025.1  | 2.17%  |
| 7221.1  | 15.31% |
| 8034.1  | 17.04% |
| 5624.3  | 11.93% |
| 21368   | 45.31% |
| 6836.5  | 14.50% |
| 5897    | 12.50% |
| 15216.5 | 32.27% |
| 14343.5 | 30.41% |
| 26676.6 | 56.57% |
| 15513.3 | 32.90% |

|         |        |
|---------|--------|
| 6904.2  | 14.64% |
| 7535.9  | 15.98% |
| 10734.7 | 22.76% |
| 39398.5 | 83.54% |
| 18068.8 | 38.31% |
| 27002.6 | 57.26% |
| 6591.9  | 13.98% |
| 17813.6 | 37.77% |
| 7900.5  | 16.75% |
| 18418.6 | 39.06% |
| 14449.8 | 30.64% |
| 11788.8 | 25.00% |
| 8304.7  | 17.61% |
| 13947.2 | 29.57% |
| 14268.9 | 30.26% |
| 19685   | 41.74% |
| 20291.8 | 43.03% |
| 7690.6  | 16.31% |
| 8015.5  | 17.00% |
| 13630.5 | 28.90% |
| 11176.2 | 23.70% |
| 18942.7 | 40.17% |
| 6177.7  | 13.10% |
| 11620.7 | 24.64% |
| 7359.8  | 15.61% |
| 10538.9 | 22.35% |
| 18073.9 | 38.33% |
| 15973.5 | 33.87% |
| 9374.1  | 19.88% |
| 6067.8  | 12.87% |
| 9511.7  | 20.17% |
| 42621.8 | 90.38% |
| 25614.4 | 54.31% |
| 17129.9 | 36.32% |
| 5085.8  | 10.78% |
| 4594.3  | 9.74%  |
| 5215.8  | 11.06% |
| 11976.1 | 25.39% |
| 9813.5  | 20.81% |
| 9150.1  | 19.40% |
| 15028.2 | 31.87% |
| 13092.4 | 27.76% |
| 44180   | 93.68% |
| 9269.7  | 19.66% |
| 4867.9  | 10.32% |

|         |        |
|---------|--------|
| 12204.5 | 25.88% |
| 22511.5 | 47.73% |
| 11716   | 24.84% |
| 1609.2  | 3.41%  |
| 15261.2 | 32.36% |
| 25214.4 | 53.47% |
| 13266.1 | 28.13% |
| 4414.9  | 9.36%  |
| 267.2   | 0.57%  |
| 22052.2 | 46.76% |
| 4697.9  | 9.96%  |
| 16667.5 | 35.34% |
| 3887.1  | 8.24%  |
| 12040.7 | 25.53% |
| 12107.3 | 25.67% |
| 19404.1 | 41.15% |
| 17349.7 | 36.79% |
| 9733.7  | 20.64% |
| 19728.7 | 41.83% |
| 28372.8 | 60.16% |
| 25315   | 53.68% |
| 10604.3 | 22.49% |
| 4730.7  | 10.03% |
| 12537   | 26.58% |
| 12731.4 | 27.00% |
| 15107.4 | 32.03% |
| 2511.8  | 5.33%  |
| 12906.9 | 27.37% |
| 10865.6 | 23.04% |
| 12167.5 | 25.80% |
| 5242.5  | 11.12% |
| 9645.3  | 20.45% |
| 5833.7  | 12.37% |
| 3971.9  | 8.42%  |
| 9952.4  | 21.10% |
| 19685.3 | 41.74% |
| 9815.3  | 20.81% |
| 24689.3 | 52.35% |
| 12817.9 | 27.18% |
| 15039.1 | 31.89% |
| 15074.4 | 31.96% |
| 4328.8  | 9.18%  |
| 13248.4 | 28.09% |
| 9388.1  | 19.91% |
| 9913.1  | 21.02% |

|         |        |
|---------|--------|
| 2211.1  | 4.69%  |
| 5149.1  | 10.92% |
| 24287.4 | 51.50% |
| 8978.8  | 19.04% |
| 19344.3 | 41.02% |
| 14183   | 30.07% |
| 8096.2  | 17.17% |
| 1340.2  | 2.84%  |
| 17735.2 | 37.61% |
| 8941.8  | 18.96% |
| 15601   | 33.08% |
| 13502.5 | 28.63% |
| 11852.9 | 25.13% |
| 26684.3 | 56.58% |
| 13063.8 | 27.70% |
| 18745.8 | 39.75% |
| 23919.2 | 50.72% |
| 18096.3 | 38.37% |
| 22832.1 | 48.41% |
| 15249.2 | 32.34% |
| 14942   | 31.68% |
| 10792.3 | 22.88% |
| 2157.6  | 4.58%  |
| 21946.3 | 46.54% |
| 2754.8  | 5.84%  |
| 11615.4 | 24.63% |
| 45020.6 | 95.46% |
| 6460.9  | 13.70% |
| 12563.3 | 26.64% |
| 10079.4 | 21.37% |
| 1565.2  | 3.32%  |
| 1641    | 3.48%  |
| 13193.1 | 27.98% |
| 13486.2 | 28.60% |
| 5126.4  | 10.87% |
| 20523.6 | 43.52% |

## Supplementary Table 2

### **Motif Name (Size 1000)-Mature Adipocytes**

CEBPB\_MOUSE.H10MO.A  
CEBPA\_MOUSE.H10MO.B  
CEBPD\_MOUSE.H10MO.B  
CEBP(bZIP)/CEBPb-ChIP-Seq(GSE21512)/Homer  
DBP\_MOUSE.H10MO.B  
PPARG\_MOUSE.H10MO.A  
CEBPG\_MOUSE.H10MO.C  
PPARE(NR/DR1)/3T3L1-Pparg-ChIP-Seq(GSE13511)/Homer  
CEBP:AP1(bZIP)/ThioMac-CEBPb-ChIP-Seq(GSE21512)/Homer  
RXR(NR/DR1)/3T3L1-RXR-ChIP-Seq(GSE13511)/Homer  
PPARA\_MOUSE.H10MO.C  
NR2C2\_MOUSE.H10MO.A  
HLF\_MOUSE.H10MO.C  
CEBPE\_MOUSE.H10MO.A  
COT1\_MOUSE.H10MO.S  
NFIA\_MOUSE.H10MO.C  
NF1(CTF)/LNCAP-NF1-ChIP-Seq(Unpublished)/Homer  
Atf4(bZIP)/MEF-Atf4-ChIP-Seq(GSE35681)/Homer  
NF1-halfsite(CTF)/LNCaP-NF1-ChIP-Seq(Unpublished)/Homer  
PPARD\_MOUSE.H10MO.D  
COT2\_MOUSE.H10MO.B  
EBF(EBF)/proBcell-EBF-ChIP-Seq(GSE21978)/Homer  
COE1\_MOUSE.H10MO.C  
HNF4A\_MOUSE.H10MO.A  
NR4A2\_MOUSE.H10MO.C  
PPARG\_MOUSE.H10MO.S  
COT2\_MOUSE.H10MO.S  
COT1\_MOUSE.H10MO.B  
ERR1\_MOUSE.H10MO.A  
Nur77(NR)/K562-NR4A1-ChIP-Seq(GSE31363)/Homer  
Tlx?(NR)/NPC-H3K4me1-ChIP-Seq(GSE16256)/Homer  
PPARA\_MOUSE.H10MO.S  
NR4A3\_MOUSE.H10MO.D  
Chop(bZIP)/MEF-Chop-ChIP-Seq(GSE35681)/Homer  
NR2C1\_MOUSE.H10MO.C  
NR1H2\_MOUSE.H10MO.D  
TR4(NR/DR1)/Hela-TR4-ChIP-Seq(GSE24685)/Homer  
Erra(NR)/HepG2-Erra-ChIP-Seq(GSE31477)/Homer  
  
NR1D1\_MOUSE.H10MO.D  
HNF4a(NR/DR1)/HepG2-HNF4a-ChIP-Seq(GSE25021)/Homer  
EBF1(EBF)/Near-E2A-ChIP-Seq(GSE21512)/Homer  
Esrrb(NR)/mES-Esrrb-ChIP-Seq(GSE11431)/Homer

NFIA\_MOUSE.H10MO.S  
GRE/RAW264.7-GRE-ChIP-Seq(Unpublished)/Homer  
NR2F6\_MOUSE.H10MO.D  
ERR2\_MOUSE.H10MO.B  
GRE(NR/IR3)/A549-GR-ChIP-Seq(GSE32465)/Homer  
RARB\_MOUSE.H10MO.D  
ARE(NR)/LNCAP-AR-ChIP-Seq(GSE27824)/Homer  
NR1I3\_MOUSE.H10MO.C  
RORA\_MOUSE.H10MO.B  
NFIL3\_MOUSE.H10MO.C  
ESR2\_MOUSE.H10MO.S  
NR4A1\_MOUSE.H10MO.C  
ERR3\_MOUSE.H10MO.B  
GFI1B\_MOUSE.H10MO.C  
HNF4G\_MOUSE.H10MO.C  
AMYB(HTH)/Testes-AMYB-ChIP-Seq(GSE44588)/Homer  
Gfi1b(Zf)/HPC7-Gfi1b-ChIP-Seq(GSE22178)/Homer  
BMYB(HTH)/Hela-BMYB-ChIPSeq(GSE27030)/Homer  
PRGR\_MOUSE.H10MO.C  
GFI1\_MOUSE.H10MO.C  
Nr5a2(NR)/Pancreas-LRH1-ChIP-Seq(GSE34295)/Homer  
ANDR\_MOUSE.H10MO.B  
Nr5a2(NR)/mES-Nr5a2-ChIP-Seq(GSE19019)/Homer  
NR1I3\_MOUSE.H10MO.S  
RARA\_MOUSE.H10MO.S  
RARG\_MOUSE.H10MO.S  
VDR\_MOUSE.H10MO.S  
AP-2alpha(AP2)/Hela-AP2alpha-ChIP-Seq(GSE31477)/Homer  
MEF2A\_MOUSE.H10MO.B  
AP-2gamma(AP2)/MCF7-TFAP2C-ChIP-Seq(GSE21234)/Homer  
NR5A2\_MOUSE.H10MO.A  
AP2A\_MOUSE.H10MO.A  
MTF1\_MOUSE.H10MO.C  
GCR\_MOUSE.H10MO.C  
NR2E3\_MOUSE.H10MO.C  
NR1I2\_MOUSE.H10MO.S  
PR(NR)/T47D-PR-ChIP-Seq(GSE31130)/Homer  
TLX1\_MOUSE.H10MO.D  
RXRB\_MOUSE.H10MO.C  
RORG\_MOUSE.H10MO.C  
Reverb(NR/DR2)/BLRP(RAW)-Reverba-ChIP-Seq(GSE45914)/Homer  
Unknown6/Drosophila-Promoters/Homer  
Mef2c(MADS)/GM12878-Mef2c-ChIP-Seq(GSE32465)/Homer  
AARE(HLH)/mES-cMyc-ChIP-Seq/Homer  
  
CEBP:CEBP(bZIP)/MEF-Chop-ChIP-Seq(GSE35681)/Homer

AP2C\_MOUSE.H10MO.A  
MEF2D\_MOUSE.H10MO.C  
ZEP2\_MOUSE.H10MO.D  
MEF2C\_MOUSE.H10MO.B  
THA\_MOUSE.H10MO.S  
STF1\_MOUSE.H10MO.B  
ZFX(Zf)/mES-Zfx-ChIP-Seq(GSE11431)/Homer  
HRE(HSF)/Striatum-HSF1-ChIP-Seq(GSE38000)/Homer  
PAX5\_MOUSE.H10MO.S  
MYB\_MOUSE.H10MO.C  
THA\_MOUSE.H10MO.C  
Tcf12(HLH)/GM12878-Tcf12-ChIP-Seq(GSE32465)/Homer  
NR1I2\_MOUSE.H10MO.C  
NR6A1\_MOUSE.H10MO.B  
Ap4(HLH)/AML-Tfap4-ChIP-Seq(GSE45738)/Homer

RXRA\_MOUSE.H10MO.C  
P73\_MOUSE.H10MO.D  
CHR/Cell-Cycle-Exp/Homer  
HNF1A\_MOUSE.H10MO.A  
FOXA1(Forkhead)/LNCAP-FOXA1-ChIP-Seq(GSE27824)/Homer  
RXRG\_MOUSE.H10MO.C  
SUT1?/SacCer-Promoters/Homer  
GAGA-repeat/SacCer-Promoters/Homer  
AR-halfsite(NR)/LNCaP-AR-ChIP-Seq(GSE27824)/Homer  
THB\_MOUSE.H10MO.S  
DLX3\_MOUSE.H10MO.C  
Rbpj1(?)/Panc1-Rbpj1-ChIP-Seq(GSE47459)/Homer  
ZNF143|STAF(Zf)/CUTLL-ZNF143-ChIP-Seq(GSE29600)/Homer  
LXRE(NR/DR4)/BLRP(RAW)-LXRb-ChIP-Seq(GSE21512)/Homer  
HESX1\_MOUSE.H10MO.D  
NF2L2\_MOUSE.H10MO.D  
MEIS1\_MOUSE.H10MO.C  
SPZ1\_MOUSE.H10MO.D  
TRa(NR)/C17.2-TRa-ChIP-Seq(GSE38347)/Homer  
ZNF711(Zf)/SH-SY5Y-ZNF711-ChIP-Seq(GSE20673)/Homer  
SUH\_MOUSE.H10MO.C  
ISL1\_MOUSE.H10MO.D  
SOX4\_MOUSE.H10MO.C  
MyoD(HLH)/Myotube-MyoD-ChIP-Seq(GSE21614)/Homer  
MYB(HTH)/ERMYB-Myb-ChIPSeq(GSE22095)/Homer  
STAT2\_MOUSE.H10MO.B  
Initiator/Drosophila-Promoters/Homer  
TEAD4\_MOUSE.H10MO.D  
FOXA1(Forkhead)/MCF7-FOXA1-ChIP-Seq(GSE26831)/Homer



RARG\_MOUSE.H10MO.C

| Consensus           | P-value   | Log P-value | q-value (Benjamini) |
|---------------------|-----------|-------------|---------------------|
| KATTGCAYAAT         | 1.00E-154 | -3.56E+02   | 0                   |
| TATTKTGCAATA        | 1.00E-122 | -2.83E+02   | 0                   |
| RRTTRBGCAAT         | 1.00E-115 | -2.67E+02   | 0                   |
| ATTGCGCAAC          | 1.00E-102 | -2.36E+02   | 0                   |
| RTTATGYAABM         | 1.00E-76  | -1.75E+02   | 0                   |
| AASTRGGKCAAAGGTCA   | 1.00E-75  | -1.75E+02   | 0                   |
| ATTKTGCAATCTB       | 1.00E-59  | -1.37E+02   | 0                   |
| TGACCTTTGCCCA       | 1.00E-54  | -1.26E+02   | 0                   |
| DRTGTTGCAA          | 1.00E-52  | -1.22E+02   | 0                   |
| TAGGGCAAAGGTCA      | 1.00E-51  | -1.18E+02   | 0                   |
| AGGTCAAAGGTCA       | 1.00E-49  | -1.15E+02   | 0                   |
| RGGTCAAAGGTCA       | 1.00E-49  | -1.14E+02   | 0                   |
| GATTRYGTAAYMS       | 1.00E-40  | -9.24E+01   | 0                   |
| TTGCGMAATCTY        | 1.00E-39  | -9.18E+01   | 0                   |
| GKTCAAAGGTCA        | 1.00E-36  | -8.43E+01   | 0                   |
| TTGGCANGNTGCCAR     | 1.00E-35  | -8.27E+01   | 0                   |
| CYTGGCABNSTGCCAR    | 1.00E-35  | -8.26E+01   | 0                   |
| MTGATGCAAT          | 1.00E-33  | -7.80E+01   | 0                   |
| YTGCCAAG            | 1.00E-30  | -7.09E+01   | 0                   |
| YAGGNBAAAGGTCA      | 1.00E-29  | -6.68E+01   | 0                   |
| CAAAGGTCAA          | 1.00E-28  | -6.66E+01   | 0                   |
| DGTCCCYRGGGA        | 1.00E-28  | -6.65E+01   | 0                   |
| GTCCCTGGGGASY       | 1.00E-27  | -6.39E+01   | 0                   |
| RGGBCAAAGTYCA       | 1.00E-27  | -6.35E+01   | 0                   |
| AAAGGTCAS           | 1.00E-27  | -6.25E+01   | 0                   |
| MAWAGGTCA           | 1.00E-26  | -6.19E+01   | 0                   |
| RAGGTCAAAGGTCAA     | 1.00E-24  | -5.59E+01   | 0                   |
| CAAAGGTCA           | 1.00E-23  | -5.45E+01   | 0                   |
| YCAAGGTCA           | 1.00E-22  | -5.14E+01   | 0                   |
| TGACCTTTNCNT        | 1.00E-21  | -5.07E+01   | 0                   |
| CTGGCAGSCTGCCA      | 1.00E-21  | -4.91E+01   | 0                   |
| AAGGTCA             | 1.00E-20  | -4.62E+01   | 0                   |
| CAAAGGTCAS          | 1.00E-19  | -4.57E+01   | 0                   |
| ATTGCATCAT          | 1.00E-19  | -4.55E+01   | 0                   |
| GSCCAGAGGTCAB       | 1.00E-19  | -4.43E+01   | 0                   |
| TAAAGGTCAAAGGTCAACG | 1.00E-18  | -4.28E+01   | 0                   |
| GAGGTCAAAGGTCA      | 1.00E-18  | -4.24E+01   | 0                   |
| CAAAGGTCAG          | 1.00E-17  | -4.13E+01   | 0                   |
| ARGDVMVWAGGTCAGDGG  |           |             |                     |
| G                   | 1.00E-16  | -3.80E+01   | 0                   |
| CARRGKBCAAAGTYCA    | 1.00E-16  | -3.69E+01   | 0                   |
| GTCCCCWGGGGA        | 1.00E-15  | -3.65E+01   | 0                   |
| KTGACCTTGA          | 1.00E-15  | -3.49E+01   | 0                   |

|                     |          |           |        |
|---------------------|----------|-----------|--------|
| MTTGGCA             | 1.00E-14 | -3.45E+01 | 0      |
| VAGRACAKWCTGTYC     | 1.00E-13 | -3.14E+01 | 0      |
| AGGWCAAAGKTCANNKGA  | 1.00E-13 | -3.07E+01 | 0      |
| TCAAGGTCA           | 1.00E-13 | -3.01E+01 | 0      |
| NRGVACABNVTGTYCY    | 1.00E-12 | -2.90E+01 | 0      |
| SAGGTCAGRRV         | 1.00E-12 | -2.82E+01 | 0      |
| RGRACASNSTGTYCYB    | 1.00E-11 | -2.69E+01 | 0      |
| GRGGTCARRRAAGTTCAK  | 1.00E-10 | -2.52E+01 | 0      |
| AWAASTAGGTCA        | 1.00E-10 | -2.52E+01 | 0      |
| GTTAYGTAAYKYMK      | 1.00E-10 | -2.48E+01 | 0      |
| AGGTCAS             | 1.00E-09 | -2.24E+01 | 0      |
| RAAGGTCAS           | 1.00E-09 | -2.20E+01 | 0      |
| TCAAGGTCA           | 1.00E-09 | -2.12E+01 | 0      |
| GCTGWGATTTV         | 1.00E-09 | -2.07E+01 | 0      |
| GGCCAAAGTCCA        | 1.00E-08 | -2.02E+01 | 0      |
| TGGCAGTTGG          | 1.00E-08 | -2.00E+01 | 0      |
| MAATCACTGC          | 1.00E-08 | -1.96E+01 | 0      |
| NHAACBGYYV          | 1.00E-08 | -1.95E+01 | 0      |
| RGAACANYCTGTH       | 1.00E-08 | -1.86E+01 | 0      |
| GCWGTGATTT          | 1.00E-08 | -1.85E+01 | 0      |
| BTCAAGGTCA          | 1.00E-07 | -1.68E+01 | 0      |
| GGWACABVRTGTTCTT    | 1.00E-07 | -1.65E+01 | 0      |
| BTCAAGGTCA          | 1.00E-07 | -1.64E+01 | 0      |
| RAGTTCAB            | 1.00E-07 | -1.64E+01 | 0      |
| SAGGTCA             | 1.00E-06 | -1.61E+01 | 0      |
| GAGGTCA             | 1.00E-06 | -1.61E+01 | 0      |
| GRGKTCA             | 1.00E-06 | -1.61E+01 | 0      |
| ATGCCCTGAGGC        | 1.00E-06 | -1.56E+01 | 0      |
| RDKCTATTTWTAGM      | 1.00E-06 | -1.55E+01 | 0      |
| SCCTSAGGSCAW        | 1.00E-06 | -1.55E+01 | 0      |
| YTCAAGGTCAN         | 1.00E-06 | -1.54E+01 | 0      |
| GCCTGRGGC           | 1.00E-06 | -1.45E+01 | 0      |
| MKGCCGTGTGCAAARS    | 1.00E-06 | -1.42E+01 | 0      |
| GAGAACAkWVWGTNCHDR  | 1.00E-05 | -1.31E+01 | 0      |
| AAAGTCAAAAAGTCA     | 1.00E-05 | -1.29E+01 | 0      |
| RAGTTCAB            | 1.00E-05 | -1.25E+01 | 0      |
| VAGRACAKNCTGTBC     | 1.00E-05 | -1.23E+01 | 0      |
| CTGGYAMBDDGCCAAGR   | 1.00E-05 | -1.21E+01 | 0.0001 |
| TSAGGTCACR          | 1.00E-05 | -1.19E+01 | 0.0001 |
| DWAAGTRGGTCAG       | 1.00E-05 | -1.17E+01 | 0.0001 |
| GTRGGTCASTGGGTCA    | 1.00E-05 | -1.17E+01 | 0.0001 |
| AATTTTAAAA          | 1.00E-04 | -1.09E+01 | 0.0002 |
| DCYAAAAATAGM        | 1.00E-04 | -1.05E+01 | 0.0002 |
| GATTGCATCA          | 1.00E-04 | -1.03E+01 | 0.0003 |
| NTNATGCAAYMNNHTGMAA |          |           |        |
| Y                   | 1.00E-04 | -1.01E+01 | 0.0003 |

|                            |          |           |        |
|----------------------------|----------|-----------|--------|
| GCCTGRGGC                  | 1.00E-04 | -1.00E+01 | 0.0004 |
| GCTATTTTTAGV               | 1.00E-04 | -9.76E+00 | 0.0005 |
| GGTDGGGWAACCCS             | 1.00E-04 | -9.54E+00 | 0.0006 |
| TKCTAWAAATAGM              | 1.00E-04 | -9.51E+00 | 0.0006 |
| YTCAGGTCAS                 | 1.00E-04 | -9.38E+00 | 0.0007 |
| YCAAGGTCA                  | 1.00E-04 | -9.25E+00 | 0.0008 |
| AGGCCTRG                   | 1.00E-03 | -9.11E+00 | 0.0009 |
| TTCTAGAABNTTCTA            | 1.00E-03 | -9.09E+00 | 0.0009 |
| GGCTGAGG                   | 1.00E-03 | -8.72E+00 | 0.0012 |
| GTGGCAGTTGG                | 1.00E-03 | -8.68E+00 | 0.0013 |
| RGGTCABTTCAGGTCAG          | 1.00E-03 | -8.40E+00 | 0.0017 |
| VCAGCTGYTG                 | 1.00E-03 | -8.37E+00 | 0.0017 |
| DDRGGTCAANNAAGTTCAB        | 1.00E-03 | -8.28E+00 | 0.0018 |
| AAGTTCAAGGTCA              | 1.00E-03 | -8.15E+00 | 0.0021 |
| NAHCAGCTGD                 | 1.00E-03 | -8.06E+00 | 0.0023 |
| RGGRTCARRAGTTCAAGGT<br>CAG | 1.00E-03 | -8.06E+00 | 0.0023 |
| GGGGCADGYYYB               | 1.00E-03 | -8.05E+00 | 0.0023 |
| SRGTTTCAA                  | 1.00E-03 | -7.98E+00 | 0.0024 |
| RGTTAATAATTAACM            | 1.00E-03 | -7.87E+00 | 0.0026 |
| WAAGTAAACA                 | 1.00E-03 | -7.84E+00 | 0.0027 |
| RAGTTCAAGGTCAGCCT          | 1.00E-03 | -7.81E+00 | 0.0027 |
| CCCCGCGC                   | 1.00E-03 | -7.62E+00 | 0.0033 |
| CTYTCTYTCTCTCTC            | 1.00E-03 | -7.55E+00 | 0.0035 |
| CCAGGAACAG                 | 1.00E-03 | -7.55E+00 | 0.0035 |
| SGTCAGGTCA                 | 1.00E-03 | -7.44E+00 | 0.0038 |
| GMTAATTACW                 | 1.00E-03 | -7.32E+00 | 0.0043 |
| HTTTCCASG                  | 1.00E-03 | -7.32E+00 | 0.0043 |
| ATTTCCCAGVAKSCY            | 1.00E-03 | -7.27E+00 | 0.0044 |
| RGGTTACTANAGGTCA           | 1.00E-03 | -7.27E+00 | 0.0044 |
| ABSYGGCWCGTRRCMT           | 1.00E-03 | -7.21E+00 | 0.0046 |
| VRTGACTCAGCA               | 1.00E-03 | -7.20E+00 | 0.0046 |
| TGACAGYTTTAHG              | 1.00E-03 | -7.17E+00 | 0.0047 |
| CGGCTGTWACCBYGGG           | 1.00E-03 | -7.12E+00 | 0.0049 |
| GGTCANYTGAGGWCA            | 1.00E-03 | -7.00E+00 | 0.0055 |
| AGGCCTAG                   | 1.00E-03 | -6.99E+00 | 0.0055 |
| CGTGGGAAA                  | 1.00E-02 | -6.84E+00 | 0.0063 |
| SYTAATR                    | 1.00E-02 | -6.84E+00 | 0.0063 |
| CSCTTTGTTCTC               | 1.00E-02 | -6.80E+00 | 0.0065 |
| RRCAGCTGYTSY               | 1.00E-02 | -6.74E+00 | 0.0068 |
| GGCVGTTR                   | 1.00E-02 | -6.67E+00 | 0.0073 |
| TCAGTTTCNKTTTCC            | 1.00E-02 | -6.65E+00 | 0.0074 |
| NTCAGTYG                   | 1.00E-02 | -6.62E+00 | 0.0075 |
| AAAATAKCYCT                | 1.00E-02 | -6.43E+00 | 0.0091 |
| WAAGTAAACA                 | 1.00E-02 | -6.41E+00 | 0.0091 |

GGRGKTCAVCNAVAGGTCAV

1.00E-02 -6.31E+00

0.0101

| # of Target Sequences with Motif(of 3228) | % of Target Sequences with Motif |
|-------------------------------------------|----------------------------------|
| 958                                       | 29.68%                           |
| 1306                                      | 40.46%                           |
| 958                                       | 29.68%                           |
| 1416                                      | 43.87%                           |
| 912                                       | 28.25%                           |
| 1825                                      | 56.54%                           |
| 974                                       | 30.17%                           |
| 1714                                      | 53.10%                           |
| 1386                                      | 42.94%                           |
| 1855                                      | 57.47%                           |
| 1446                                      | 44.80%                           |
| 1553                                      | 48.11%                           |
| 491                                       | 15.21%                           |
| 645                                       | 19.98%                           |
| 1306                                      | 40.46%                           |
| 1076                                      | 33.33%                           |
| 743                                       | 23.02%                           |
| 570                                       | 17.66%                           |
| 2234                                      | 69.21%                           |
| 1266                                      | 39.22%                           |
| 1183                                      | 36.65%                           |
| 446                                       | 13.82%                           |
| 1227                                      | 38.01%                           |
| 1438                                      | 44.55%                           |
| 1203                                      | 37.27%                           |
| 1052                                      | 32.59%                           |
| 1379                                      | 42.72%                           |
| 1183                                      | 36.65%                           |
| 1165                                      | 36.09%                           |
| 424                                       | 13.14%                           |
| 806                                       | 24.97%                           |
| 791                                       | 24.50%                           |
| 1173                                      | 36.34%                           |
| 419                                       | 12.98%                           |
| 1122                                      | 34.76%                           |
| 1030                                      | 31.91%                           |
| 294                                       | 9.11%                            |
| 2564                                      | 79.43%                           |
| 1630                                      | 50.50%                           |
| 917                                       | 28.41%                           |
| 1418                                      | 43.93%                           |
| 1138                                      | 35.25%                           |

|      |        |
|------|--------|
| 753  | 23.33% |
| 472  | 14.62% |
| 1448 | 44.86% |
| 1097 | 33.98% |
| 285  | 8.83%  |
| 1076 | 33.33% |
| 564  | 17.47% |
| 996  | 30.86% |
| 796  | 24.66% |
| 452  | 14.00% |
| 584  | 18.09% |
| 1324 | 41.02% |
| 870  | 26.95% |
| 1049 | 32.50% |
| 1019 | 31.57% |
| 1948 | 60.35% |
| 1027 | 31.82% |
| 1889 | 58.52% |
| 1149 | 35.59% |
| 950  | 29.43% |
| 1214 | 37.61% |
| 781  | 24.19% |
| 965  | 29.89% |
| 874  | 27.08% |
| 665  | 20.60% |
| 665  | 20.60% |
| 665  | 20.60% |
| 934  | 28.93% |
| 1038 | 32.16% |
| 1171 | 36.28% |
| 1189 | 36.83% |
| 728  | 22.55% |
| 416  | 12.89% |
| 1444 | 44.73% |
| 1535 | 47.55% |
| 814  | 25.22% |
| 2592 | 80.30% |
| 666  | 20.63% |
| 1052 | 32.59% |
| 796  | 24.66% |
| 250  | 7.74%  |
| 1356 | 42.01% |
| 724  | 22.43% |
| 151  | 4.68%  |
| 254  | 7.87%  |

|      |        |
|------|--------|
| 844  | 26.15% |
| 894  | 27.70% |
| 526  | 16.29% |
| 794  | 24.60% |
| 961  | 29.77% |
| 1088 | 33.71% |
| 1533 | 47.49% |
| 406  | 12.58% |
| 1221 | 37.83% |
| 615  | 19.05% |
| 1004 | 31.10% |
| 1196 | 37.05% |
| 914  | 28.31% |
| 1293 | 40.06% |
| 1553 | 48.11% |
| 1593 | 49.35% |
| 809  | 25.06% |
| 970  | 30.05% |
| 824  | 25.53% |
| 1820 | 56.38% |
| 1443 | 44.70% |
| 3041 | 94.21% |
| 3130 | 96.96% |
| 3058 | 94.73% |
| 839  | 25.99% |
| 509  | 15.77% |
| 1859 | 57.59% |
| 631  | 19.55% |
| 98   | 3.04%  |
| 473  | 14.65% |
| 867  | 26.86% |
| 856  | 26.52% |
| 370  | 11.46% |
| 614  | 19.02% |
| 1832 | 56.75% |
| 961  | 29.77% |
| 298  | 9.23%  |
| 1023 | 31.69% |
| 974  | 30.17% |
| 2035 | 63.04% |
| 1963 | 60.81% |
| 2528 | 78.31% |
| 1137 | 35.22% |
| 1588 | 49.19% |



957

29.65%

| # of Background Sequences with Motif(of<br>46649) | % of Background Sequences with<br>Motif |
|---------------------------------------------------|-----------------------------------------|
| 5653.8                                            | 12.12%                                  |
| 10225.4                                           | 21.93%                                  |
| 6531                                              | 14.01%                                  |
| 12250.8                                           | 26.27%                                  |
| 7182.2                                            | 15.40%                                  |
| 18826.5                                           | 40.37%                                  |
| 8520.1                                            | 18.27%                                  |
| 18397.5                                           | 39.45%                                  |
| 14038.4                                           | 30.11%                                  |
| 20611                                             | 44.20%                                  |
| 15007.9                                           | 32.18%                                  |
| 16470.8                                           | 35.32%                                  |
| 3775.4                                            | 8.10%                                   |
| 5498                                              | 11.79%                                  |
| 13948                                             | 29.91%                                  |
| 10973.2                                           | 23.53%                                  |
| 6831                                              | 14.65%                                  |
| 4895.9                                            | 10.50%                                  |
| 27656.9                                           | 59.31%                                  |
| 13941.3                                           | 29.90%                                  |
| 12839.4                                           | 27.53%                                  |
| 3706.7                                            | 7.95%                                   |
| 13512.4                                           | 28.98%                                  |
| 16397                                             | 35.16%                                  |
| 13236.1                                           | 28.38%                                  |
| 11256.6                                           | 24.14%                                  |
| 15854.9                                           | 34.00%                                  |
| 13242.6                                           | 28.40%                                  |
| 13110.5                                           | 28.12%                                  |
| 3763.9                                            | 8.07%                                   |
| 8474.4                                            | 18.17%                                  |
| 8374.4                                            | 17.96%                                  |
| 13432.5                                           | 28.81%                                  |
| 3818                                              | 8.19%                                   |
| 12797.8                                           | 27.44%                                  |
| 11621.2                                           | 24.92%                                  |
| 2458.3                                            | 5.27%                                   |
| 33928                                             | 72.76%                                  |
| 20127.6                                           | 43.16%                                  |
| 10349.2                                           | 22.19%                                  |
| 17203.1                                           | 36.89%                                  |
| 13406.8                                           | 28.75%                                  |

|         |        |
|---------|--------|
| 8289.5  | 17.78% |
| 4825.8  | 10.35% |
| 17909.4 | 38.41% |
| 13073.4 | 28.04% |
| 2638.6  | 5.66%  |
| 12879.5 | 27.62% |
| 6137    | 13.16% |
| 11937   | 25.60% |
| 9245.6  | 19.83% |
| 4793.3  | 10.28% |
| 6576.6  | 14.10% |
| 16659.3 | 35.73% |
| 10435.4 | 22.38% |
| 12908.5 | 27.68% |
| 12525.2 | 26.86% |
| 25745.1 | 55.21% |
| 12671.4 | 27.17% |
| 24914.6 | 53.43% |
| 14427.3 | 30.94% |
| 11683.2 | 25.05% |
| 15450.4 | 33.13% |
| 9499    | 20.37% |
| 12019.7 | 25.78% |
| 10770.7 | 23.10% |
| 7955.2  | 17.06% |
| 7955.2  | 17.06% |
| 7955.2  | 17.06% |
| 11643.5 | 24.97% |
| 13087.6 | 28.07% |
| 14945.5 | 32.05% |
| 15202.4 | 32.60% |
| 8898.3  | 19.08% |
| 4763.5  | 10.22% |
| 18989.5 | 40.72% |
| 20305.7 | 43.55% |
| 10205.1 | 21.88% |
| 35927.3 | 77.05% |
| 8215.3  | 17.62% |
| 13548.1 | 29.05% |
| 10017.5 | 21.48% |
| 2739.9  | 5.88%  |
| 17925.2 | 38.44% |
| 9114.8  | 19.55% |
| 1554.6  | 3.33%  |
| 2856.2  | 6.13%  |

|         |        |
|---------|--------|
| 10811.1 | 23.18% |
| 11526.3 | 24.72% |
| 6489.2  | 13.92% |
| 10161   | 21.79% |
| 12494.5 | 26.79% |
| 14287.8 | 30.64% |
| 20630.3 | 44.24% |
| 4906.3  | 10.52% |
| 16218.2 | 34.78% |
| 7763.7  | 16.65% |
| 13188.2 | 28.28% |
| 15900.9 | 34.10% |
| 11938.9 | 25.60% |
| 17300.9 | 37.10% |
| 21029.3 | 45.10% |
| 21605.5 | 46.33% |
| 10495.2 | 22.51% |
| 12752.7 | 27.35% |
| 10721.5 | 22.99% |
| 24912.5 | 53.42% |
| 19479.7 | 41.77% |
| 43241.6 | 92.73% |
| 44694.5 | 95.85% |
| 43518.9 | 93.33% |
| 10971.1 | 23.53% |
| 6422.3  | 13.77% |
| 25539.8 | 54.77% |
| 8100.6  | 17.37% |
| 1007.1  | 2.16%  |
| 5940.8  | 12.74% |
| 11387.5 | 24.42% |
| 11236.6 | 24.10% |
| 4553.9  | 9.77%  |
| 7890.3  | 16.92% |
| 25185.2 | 54.01% |
| 12743.2 | 27.33% |
| 3608.3  | 7.74%  |
| 13621.1 | 29.21% |
| 12937.6 | 27.74% |
| 28183.6 | 60.44% |
| 27134.5 | 58.19% |
| 35470.3 | 76.07% |
| 15277.4 | 32.76% |
| 21728.2 | 46.60% |

12746.1

27.33%

Supplementary Table 3-Preadipocytes

| Motif.Name (Cluster 1) | Consensus       | P.value   | Log.P.value |
|------------------------|-----------------|-----------|-------------|
|                        | TTGGCANGNTGCC   |           |             |
| NFIA_MOUSE.H10MO.C     | AR              | 1.00E-15  | -36.24      |
| NFIA_MOUSE.H10MO.S     | MTTGGCA         | 1.00E-11  | -25.47      |
| CEBPA_MOUSE.H10MO.B    | TATTKTGCAATA    | 1.00E-07  | -17.76      |
| DBP_MOUSE.H10MO.B      | RTTATGYAABM     | 1.00E-05  | -12.66      |
| BCL6_MOUSE.H10MO.C     | WTTCCTRGAAAGC   | 1.00E-04  | -11.47      |
|                        | GGSAACAGGAAR    |           |             |
| ELF3_MOUSE.H10MO.D     | Y               | 0.001     | -7.178      |
| PPARG_MOUSE.H10MO.S    | MAWAGGTCA       | 0.1       | -4.463      |
| PPARA_MOUSE.H10MO.C    | AGGTCAAAGGTCA   | 0.1       | -3.288      |
| PPARA_MOUSE.H10MO.S    | AAGGTCA         | 0.1       | -3.061      |
|                        | AAAARAGRAAVTGA  |           |             |
| IRF4_MOUSE.H10MO.C     | AA              | 0.1       | -2.484      |
|                        | RSCKGGGAGGTGG   |           |             |
| KLF15_MOUSE.H10MO.D    | GGSS            | 0.1       | -2.373      |
|                        | AASTRGGKCAAAG   |           |             |
| PPARG_MOUSE.H10MO.A    | GTCA            | 1         | -1.437      |
|                        | GHWVHMATTGTTBT  |           |             |
| SOX18_MOUSE.H10MO.D    | YKTCC           | 1         | -0.6563     |
|                        | DKGGKKGKGGGTG   |           |             |
| RREB1_MOUSE.H10MO.D    | KTTTGGGGT       | 1         | -0.1514     |
|                        | RAGTTCAAGGTCAAG |           |             |
| RXRG_MOUSE.H10MO.C     | CCT             | 1         | -3.40E-05   |
|                        |                 |           |             |
| Motif.Name (Cluster 2) | Consensus       | P.value   | Log.P.value |
| ETV4_MOUSE.H10MO.B     | SAGGAAGT        | 1.00E-11  | -25.75      |
| IRF7_MOUSE.H10MO.C     | GAAASYGAAA      | 1.00E-05  | -13.13      |
| KLF4_MOUSE.H10MO.C     | WGGGYGKGGCCS    | 0.001     | -8.386      |
| MAFB_MOUSE.H10MO.D     | TGCTGACDS       | 0.01      | -6.476      |
| HNF1B_MOUSE.H10MO.B    | GGTTAATRATTAAC  | 0.1       | -3.401      |
| IRF9_MOUSE.H10MO.C     | GAAAGCGAAACT    | 0.1       | -3.325      |
| ARNT2_MOUSE.H10MO.D    | GNCGTGGSAGRC    | 1         | -1.567      |
|                        |                 |           |             |
| Motif.Name (Cluster 3) | Consensus       | P.value   | Log.P.value |
| FOSL1_MOUSE.H10MO.C    | DRTGACTCAYN     | 1.00E-278 | -640.5      |
| TEAD4_MOUSE.H10MO.D    | AAAAATAKCYCT    | 1.00E-10  | -24.89      |
| CEBPB_MOUSE.H10MO.A    | KATTGCAYAAT     | 1.00E-08  | -19.75      |
| RUNX3_MOUSE.H10MO.B    | KGGGKTTTGTGGTT  | 1         | -1.997      |

|                     |              |   |          |
|---------------------|--------------|---|----------|
| DLX3_MOUSE.H10MO.C  | GMTAATTACW   | 1 | -0.5721  |
| MYC_MOUSE.H10MO.A   | GSRASCACGTGG | 1 | -0.03625 |
| SNAI1_MOUSE.H10MO.C | CCAGGTGG     | 1 | 0        |

| Motif.Name (Cluster 4) | Consensus        | P.value   | Log.P.value |
|------------------------|------------------|-----------|-------------|
| FOSL2_MOUSE.H10MO.A    | GGATGAGTCAY      | 1.00E-276 | -637.8      |
| JUNB_MOUSE.H10MO.B     | DVTGAGTCAK       | 1.00E-240 | -554.1      |
| RUNX1_MOUSE.H10MO.B    | TYTGTGGTTA       | 1.00E-18  | -42.19      |
| ATF3_MOUSE.H10MO.A     | GTGACGYMA        | 1.00E-05  | -11.61      |
| FOXD1_MOUSE.H10MO.D    | CWWTGTTTACHTAA   | 0.001     | -7.737      |
| NFIL3_MOUSE.H10MO.C    | GTTAYGTAAYKYMK   | 0.01      | -5.828      |
| ETS2_MOUSE.H10MO.C     | SMVGGAAGTGG      | 0.01      | -5.324      |
| NR4A2_MOUSE.H10MO.C    | AAAGGTCAS        | 0.01      | -5.131      |
| GATA2_MOUSE.H10MO.A    | RSAGATAAGR       | 0.1       | -4.393      |
| FOXC2_MOUSE.H10MO.D    | GTTTGTGTTTGYCAGA | 0.1       | -4.363      |
| FOXF2_MOUSE.H10MO.D    | TGTTTACHTWD      | 0.1       | -3.99       |
| VDR_MOUSE.H10MO.S      | GRGKTCA          | 0.1       | -3.858      |
| NR4A3_MOUSE.H10MO.D    | CAAAGGTCAS       | 0.1       | -2.985      |
| CREM_MOUSE.H10MO.C     | CRVTGACGTCA      | 1         | -2.07       |
| HMGA2_MOUSE.H10MO.D    | AATAWYSGSSAATAT  | 1         | -1.147      |
| EGR2_MOUSE.H10MO.C     | DGCGTGGGCGG      | 1         | -1.062      |
| DLX2_MOUSE.H10MO.D     | ATAATTAB         | 1         | -0.68       |
| SOX13_MOUSE.H10MO.D    | YATTGTTY         | 1         | -0.3804     |
| NR4A1_MOUSE.H10MO.C    | RAAGGTCAS        | 1         | -0.3802     |
| VDR_MOUSE.H10MO.C      | GGGTCAWNGRGTTT   | 1         | -0.3278     |
| PITX2_MOUSE.H10MO.D    | TKGGATTAMH       | 1         | -2.00E-06   |

| q.value..Benjamin<br>i. | X..of.Target.Sequences.with.Motif.of.28<br>51. | X..of.Target.Sequences.with.Mo<br>tif |        |
|-------------------------|------------------------------------------------|---------------------------------------|--------|
|                         | 0                                              | 822                                   | 28.83% |
|                         | 0                                              | 617                                   | 21.64% |
|                         | 0                                              | 775                                   | 27.18% |
|                         | 0                                              | 535                                   | 18.77% |
| 1.00E-04                |                                                | 1146                                  | 40.20% |
|                         | 0.003                                          | 1155                                  | 40.51% |
|                         | 0.0335                                         | 733                                   | 25.71% |
|                         | 0.0903                                         | 913                                   | 32.02% |
|                         | 0.1065                                         | 552                                   | 19.36% |
|                         | 0.1715                                         | 2273                                  | 79.73% |
|                         | 0.1885                                         | 1154                                  | 40.48% |
|                         | 0.416                                          | 1140                                  | 39.99% |
|                         | 0.7793                                         | 841                                   | 29.50% |
|                         | 1                                              | 1501                                  | 52.65% |
|                         | 1                                              | 1042                                  | 36.55% |

| q.value..Benjamin | X..of.Target.Sequences.with.Motif.of.285 | X..of.Target.Sequences.with.Motif |        |
|-------------------|------------------------------------------|-----------------------------------|--------|
|                   | 0                                        | 1161                              | 40.72% |
|                   | 0                                        | 1267                              | 44.44% |
|                   | 0.001                                    | 865                               | 30.34% |
|                   | 0.0056                                   | 720                               | 25.25% |
|                   | 0.0825                                   | 650                               | 22.80% |
|                   | 0.0878                                   | 903                               | 31.67% |
|                   | 0.3696                                   | 518                               | 18.17% |

| q.value..Benjamin | X..of.Target.Sequences.with.Motif.of.285 | X..of.Target.Sequences.with.Motif |        |
|-------------------|------------------------------------------|-----------------------------------|--------|
|                   | 0                                        | 1515                              | 53.14% |
|                   | 0                                        | 1128                              | 39.57% |
|                   | 0                                        | 464                               | 16.27% |
| 0.2568            |                                          | 812                               | 28.48% |



|        |     |        |
|--------|-----|--------|
| 0.8304 | 417 | 14.63% |
| 1      | 608 | 21.33% |
| 1      | 494 | 17.33% |

q.value..Benjamini X..of.Target.Sequences.with.Motif.of.285 X..of.Target.Sequences.with.Motif

|          |      |        |
|----------|------|--------|
| 0        | 1439 | 50.47% |
| 0        | 1526 | 53.53% |
| 0        | 933  | 32.73% |
| 1.00E-04 | 446  | 15.64% |
| 0.0018   | 882  | 30.94% |
| 0.01     | 357  | 12.52% |
| 0.016    | 899  | 31.53% |
| 0.0192   | 852  | 29.88% |
| 0.0356   | 655  | 22.97% |
| 0.0363   | 1108 | 38.86% |
| 0.0506   | 1277 | 44.79% |
| 0.0556   | 510  | 17.89% |
| 0.1132   | 851  | 29.85% |
| 0.2437   | 364  | 12.77% |
| 0.5305   | 401  | 14.07% |
| 0.5674   | 779  | 27.32% |
| 0.7626   | 394  | 13.82% |
| 0.9463   | 489  | 17.15% |
| 0.9463   | 999  | 35.04% |
| 0.9758   | 521  | 18.27% |
| 1        | 656  | 23.01% |

X..of.Background.Sequences.with.Motif.of.471 X..of.Background.Sequences.with.M  
59. otif

|         |        |
|---------|--------|
| 10501.5 | 22.27% |
| 7902.9  | 16.76% |
| 10734.7 | 22.76% |
| 7359.8  | 15.61% |
| 17129.9 | 36.32% |
| 17735.2 | 37.61% |
| 11255.2 | 23.87% |
| 14367.8 | 30.47% |
| 8549.8  | 18.13% |
| 37091.6 | 78.65% |
| 18511   | 39.25% |
| 18541.2 | 39.32% |
| 13923.8 | 29.52% |
| 25295.5 | 53.64% |
| 18945.2 | 40.17% |

X..of.Background.Sequences.with.Motif.of.471 X..of.Background.Sequences.with.Mc

|         |        |
|---------|--------|
| 16319.8 | 34.61% |
| 18942.7 | 40.17% |
| 12906.9 | 27.37% |
| 10792.3 | 22.88% |
| 10077   | 21.37% |
| 14197.8 | 30.11% |
| 8288.3  | 17.57% |

X..of.Background.Sequences.with.Motif.of.471 X..of.Background.Sequences.with.Mc

|         |        |
|---------|--------|
| 10548   | 22.37% |
| 15844.8 | 33.60% |
| 5897    | 12.50% |
| 12989.9 | 27.54% |

|         |        |
|---------|--------|
| 6942.3  | 14.72% |
| 10713.6 | 22.72% |
| 12465.9 | 26.43% |

X..of.Background.Sequences.with.Motif.of.471:X..of.Background.Sequences.with.Mc

|         |        |
|---------|--------|
| 9618.1  | 20.39% |
| 11547.2 | 24.49% |
| 11934.6 | 25.31% |
| 6067.8  | 12.87% |
| 13248.4 | 28.09% |
| 5126.4  | 10.87% |
| 13818   | 29.30% |
| 13083.2 | 27.74% |
| 10010   | 21.23% |
| 17366   | 36.82% |
| 20202   | 42.84% |
| 7757.7  | 16.45% |
| 13413.1 | 28.44% |
| 5683.6  | 12.05% |
| 6482.1  | 13.75% |
| 12723.8 | 26.98% |
| 6516.9  | 13.82% |
| 8242.3  | 17.48% |
| 16719.4 | 35.45% |
| 8812.4  | 18.69% |
| 12608.9 | 26.74% |

tif

tif

atif

Supplementary Table 3-Mature Adipocytes

| Motif.Name(Cluster 1) | Consensus                      | P.value   |
|-----------------------|--------------------------------|-----------|
| CEBPA_MOUSE.H10MO.B   | TATTKTGCAATA                   | 1.00E-122 |
| DBP_MOUSE.H10MO.B     | RTTATGYAABM                    | 1.00E-76  |
| PPARG_MOUSE.H10MO.A   | AASTRGGKCAA<br>AGGTCA          | 1.00E-75  |
| PPARA_MOUSE.H10MO.C   | AGGTCAAAGGT<br>CA              | 1.00E-49  |
| NFIA_MOUSE.H10MO.C    | TTGGCANGNTG<br>CCAR            | 1.00E-35  |
| PPARG_MOUSE.H10MO.S   | MAWAGGTCA                      | 1.00E-26  |
| PPARA_MOUSE.H10MO.S   | AAGGTCA                        | 1.00E-20  |
| NFIA_MOUSE.H10MO.S    | MTTGGCA                        | 1.00E-14  |
| RXRG_MOUSE.H10MO.C    | RAGTTCAAGGT<br>CAGCCT          | 0.001     |
| SOX18_MOUSE.H10MO.D   | GHWHVMATTGT<br>TBTYKTCC        | 0.1       |
| IRF4_MOUSE.H10MO.C    | AAAARAGRAAV<br>TGAAA           | 1         |
| KLF15_MOUSE.H10MO.D   | RSCKGGGAGGT<br>GGGSS           | 1         |
| RREB1_MOUSE.H10MO.D   | DKGGKKGKGG<br>GTGKTTTGGGG<br>T | 1         |
| ELF3_MOUSE.H10MO.D    | GGSAAACAGGA<br>ARY             | 1         |
| BCL6_MOUSE.H10MO.C    | WTTCCTRGAAA<br>GC              | 1         |
| Motif.Name(Cluster 2) | Consensus                      | P.value   |
| HNF1B_MOUSE.H10MO.B   | GGTTAATRATTAA                  | 0.1       |
| IRF7_MOUSE.H10MO.C    | GAAASYGAAA                     | 0.1       |
| IRF9_MOUSE.H10MO.C    | GAAAGCGAAACT                   | 1         |
| KLF4_MOUSE.H10MO.C    | WGGGYGKGGCC                    | 1         |
| MAFB_MOUSE.H10MO.D    | TGCTGACDS                      | 1         |
| ARNT2_MOUSE.H10MO.D   | GNCGTGGSAGRI                   | 1         |
| ETV4_MOUSE.H10MO.B    | SAGGAAGT                       | 1         |
| Motif.Name(Cluster 3) | Consensus                      | P.value   |
| CEBPB_MOUSE.H10MO.A   | KATTGCAYAAT                    | 1.00E-154 |
| DLX3_MOUSE.H10MO.C    | GMTAATTACW                     | 0.001     |
| TEAD4_MOUSE.H10MO.D   | AAAATAKCYCT                    | 0.01      |
| FOSL1_MOUSE.H10MO.C   | DRTGACTCAYN                    | 1         |
| MYC_MOUSE.H10MO.A     | GSRASCACGTGC                   | 1         |

|                     |              |   |
|---------------------|--------------|---|
| RUNX3_MOUSE.H10MO.B | KGGGKTTTGTGC | 1 |
| SNAI1_MOUSE.H10MO.C | CCAGGTGG     | 1 |

| Motif.Name(Cluster 4) | Consensus      | P.value  |
|-----------------------|----------------|----------|
| NR4A2_MOUSE.H10MO.C   | AAAGGTCAS      | 1.00E-27 |
| NR4A3_MOUSE.H10MO.D   | CAAAGGTCAS     | 1.00E-19 |
| NFIL3_MOUSE.H10MO.C   | GTTAYGTAAYKYM  | 1.00E-10 |
| NR4A1_MOUSE.H10MO.C   | RAAGGTCAS      | 1.00E-09 |
| VDR_MOUSE.H10MO.S     | GRGKTCA        | 1.00E-06 |
| FOXF2_MOUSE.H10MO.D   | TGTTTACHTWD    | 0.01     |
| ATF3_MOUSE.H10MO.A    | GTGACGYMA      | 0.1      |
| FOXD1_MOUSE.H10MO.D   | CWWTGTTTACH    | 0.1      |
| FOXC2_MOUSE.H10MO.D   | GTTTGTGTTTGYC, | 0.1      |
| PITX2_MOUSE.H10MO.D   | TKGGATTAMH     | 0.1      |
| HMGA2_MOUSE.H10MO.D   | AATAWYSGSSAA   | 1        |
| JUNB_MOUSE.H10MO.B    | DVTGAGTCAK     | 1        |
| RUNX1_MOUSE.H10MO.B   | TYTGTGGTTA     | 1        |
| VDR_MOUSE.H10MO.C     | GGGTCAWNGRG    | 1        |
| CREM_MOUSE.H10MO.C    | CRVTGACGTCA    | 1        |
| DLX2_MOUSE.H10MO.D    | ATAATTAB       | 1        |
| SOX13_MOUSE.H10MO.D   | YATTGTTY       | 1        |
| FOSL2_MOUSE.H10MO.A   | GGATGAGTCAY    | 1        |
| ETS2_MOUSE.H10MO.C    | SMVGGAAGTGG    | 1        |
| EGR2_MOUSE.H10MO.C    | DGCGTGGGCGG    | 1        |
| GATA2_MOUSE.H10MO.A   | RSAGATAAGRR    | 1        |

| Log.P.value | q.value..Benjamin<br>i. | X..of.Target.Sequences.with.Motif.of.32<br>28. |
|-------------|-------------------------|------------------------------------------------|
| -282.9      | 0                       | 1306                                           |
| -175.3      | 0                       | 912                                            |
| -174.5      | 0                       | 1825                                           |
| -114.9      | 0                       | 1446                                           |
| -82.74      | 0                       | 1076                                           |
| -61.92      | 0                       | 1052                                           |
| -46.21      | 0                       | 791                                            |
| -34.52      | 0                       | 753                                            |
| -7.808      | 0.0027                  | 1443                                           |
| -2.827      | 0.2118                  | 957                                            |
| -0.4276     | 1                       | 2459                                           |
| -0.08465    | 1                       | 1318                                           |
| -0.01029    | 1                       | 1740                                           |
| -0.007744   | 1                       | 1131                                           |
| -0.000233   | 1                       | 1040                                           |

| Log.P.value | q.value..Benjamini | X..of.Target.Sequences.with.Motif.of.322 |
|-------------|--------------------|------------------------------------------|
| -3.12       | 0.1669             | 715                                      |
| -2.539      | 0.2656             | 1291                                     |
| -1.423      | 0.6043             | 930                                      |
| -1.15       | 0.722              | 965                                      |
| -0.1839     | 1                  | 723                                      |
| -0.02346    | 1                  | 569                                      |
| -0.00012    | 1                  | 1000                                     |

| Log.P.value | q.value..Benjamini | X..of.Target.Sequences.with.Motif.of.322 |
|-------------|--------------------|------------------------------------------|
| -355.6      | 0                  | 958                                      |
| -7.317      | 0.0043             | 509                                      |
| -6.429      | 0.0091             | 1137                                     |
| -1.728      | 0.4881             | 728                                      |
| -0.4428     | 1                  | 742                                      |



|         |   |     |
|---------|---|-----|
| -0.4393 | 1 | 915 |
| 0       | 1 | 781 |

| Log.P.value | q.value..Benjamini X..of.Target.Sequences.with.Motif.of.322 |      |
|-------------|-------------------------------------------------------------|------|
| -62.51      | 0                                                           | 1203 |
| -45.69      | 0                                                           | 1173 |
| -24.77      | 0                                                           | 452  |
| -21.96      | 0                                                           | 1324 |
| -16.11      | 0                                                           | 665  |
| -5.753      | 0.0169                                                      | 1428 |
| -3.873      | 0.0893                                                      | 447  |
| -3.312      | 0.1408                                                      | 927  |
| -2.84       | 0.2101                                                      | 1231 |
| -2.653      | 0.2426                                                      | 900  |
| -2.24       | 0.3308                                                      | 424  |
| -1.302      | 0.6499                                                      | 796  |
| -1.046      | 0.7783                                                      | 852  |
| -0.8118     | 0.8906                                                      | 629  |
| -0.6512     | 0.9666                                                      | 386  |
| -0.6339     | 0.9755                                                      | 418  |
| -0.5731     | 1                                                           | 533  |
| -0.5551     | 1                                                           | 649  |
| -0.05356    | 1                                                           | 909  |
| -0.001239   | 1                                                           | 842  |
| -2.00E-06   | 1                                                           | 565  |

X..of.Target.Sequences.with.Motif X..of.Background.Sequences.with.Motif.of.466  
 tif 49.

|        |         |
|--------|---------|
| 40.46% | 10225.4 |
| 28.25% | 7182.2  |
| 56.54% | 18826.5 |
| 44.80% | 15007.9 |
| 33.33% | 10973.2 |
| 32.59% | 11256.6 |
| 24.50% | 8374.4  |
| 23.33% | 8289.5  |
| 44.70% | 19479.7 |
| 29.65% | 13238.8 |
| 76.18% | 35650.3 |
| 40.83% | 19598.9 |
| 53.90% | 26074.7 |
| 35.04% | 17288.3 |
| 32.22% | 16379.7 |

X..of.Target.Sequences.with.Motif X..of.Background.Sequences.with.Motif.of.466

|        |         |
|--------|---------|
| 22.15% | 9750.2  |
| 39.99% | 18077.3 |
| 28.81% | 13168   |
| 29.89% | 13755.9 |
| 22.40% | 10770.7 |
| 17.63% | 8849    |
| 30.98% | 15856.1 |

X..of.Target.Sequences.with.Motif X..of.Background.Sequences.with.Motif.of.466

|        |         |
|--------|---------|
| 29.68% | 5653.8  |
| 15.77% | 6422.3  |
| 35.22% | 15277.4 |
| 22.55% | 10196.2 |
| 22.99% | 10839.3 |

|        |         |
|--------|---------|
| 28.35% | 13349.8 |
| 24.19% | 13320.5 |

X..of.Target.Sequences.with.Mot X..of.Background.Sequences.with.Motif.of.466

|        |         |
|--------|---------|
| 37.27% | 13236.1 |
| 36.34% | 13432.5 |
| 14.00% | 4793.3  |
| 41.02% | 16659.3 |
| 20.60% | 7955.2  |
| 44.24% | 19514.1 |
| 13.85% | 5889.6  |
| 28.72% | 12726.9 |
| 38.14% | 17154.1 |
| 27.88% | 12458.8 |
| 13.14% | 5780.8  |
| 24.66% | 11279.6 |
| 26.39% | 12164.3 |
| 19.49% | 9035.5  |
| 11.96% | 5585.6  |
| 12.95% | 6055    |
| 16.51% | 7743    |
| 20.11% | 9431.5  |
| 28.16% | 13731   |
| 26.08% | 13268.1 |
| 17.50% | 9658.3  |

X..of.Background.Sequences.with.Motif

21.93%  
15.40%

40.37%

32.18%

23.53%

24.14%

17.96%

17.78%

41.77%

28.39%

76.45%

42.03%

55.92%

37.07%

35.13%

X..of.Background.Sequences.with.Motif

20.91%

38.77%

28.24%

29.50%

23.10%

18.98%

34.00%

X..of.Background.Sequences.with.Motif

12.12%

13.77%

32.76%

21.87%

23.24%

28.63%  
28.57%

X..of.Background.Sequences.with.Motif

28.38%  
28.81%  
10.28%  
35.73%  
17.06%  
41.85%  
12.63%  
27.29%  
36.79%  
26.72%  
12.40%  
24.19%  
26.09%  
19.38%  
11.98%  
12.98%  
16.60%  
20.23%  
29.45%  
28.45%  
20.71%

Supplementary Table 4

|        | shRNA | TRCN           |
|--------|-------|----------------|
| Elf3   | 1     | TRCN0000054415 |
| Elf3   | 2     | TRCN0000054417 |
| Dbp    | 1     | TRCN0000086025 |
| Dbp    | 2     | TRCN0000086026 |
| Sox18  | 1     | TRCN0000085710 |
| Sox18  | 2     | TRCN0000085711 |
| Sox18  | 3     | TRCN0000085712 |
| Zfp467 | 1     | TRCN0000085855 |
| Zfp467 | 2     | TRCN0000085856 |
| Zfp467 | 3     | TRCN0000085857 |
| Hoxa4  | 2     | TRCN0000070791 |
| Hoxa4  | 3     | TRCN0000070792 |
| Ppara  | 1     | TRCN0000026028 |
| Ppara  | 2     | TRCN0000026041 |
| Ybx2   | 1     | TRCN0000095321 |
| Nfia   | 1     | TRCN0000012085 |
| Nfia   | 2     | TRCN0000012087 |
| Nfia   | 3     | TRCN0000012084 |

### Supplementary Figure 1

- (A) Overview of the total number of genes expressed, differentially expressed and not expressed during differentiation.
- (B) Hierarchical clustering (voom normalized counts, distance: correlation, cluster method: complete) of mRNA-seq time points and replicates.
- (C) Clusters showing two of a total of four distinct patterns of gene expression belonging to Clusters 2 and 3.
- (D) Gene ontology (GO) terms associated with genes from Cluster 2 and Cluster 3 against a background of all genes expressed during BFC differentiation (see Methods)
- (E) Distribution of Pearson product-moment correlation coefficient of the expression level of all Cluster 2 and 3 TFs, as well as controls (all TFs) with *Ucp1* expression in the BAT of BXD mouse reference panel strains (top) and human clonal BAT-derived cell lines (bottom).

### Supplementary Figure 2

- (A) Hierarchical clustering (distance: correlation, cluster method: complete) of all H3K27ac time points and replicates based on H3K27ac levels (voom normalized counts, see Methods) at all differentially acetylated (DA) regions.
- (B) Heatmaps visualizing H3K27ac ChIP-seq enrichment at regions specific for individual time-points in a 10kb window.
- (C) Distribution of H3K27ac ChIP-seq enrichment within a 10kb region around the transcription start site (TSS) of differentially expressed genes (DEGs) from each cluster. The region around the TSS is partitioned into three compartments: a red triangle represents a region from +4 to +5kb of the TSS, a black dot represents a region from +1 to -1kb around the TSS and a green triangle represents a -4 to -5 kb of the TSS.
- (D) UCSC browser screen shots of representative genes from each gene expression cluster: Cluster 1: *Ucp1* and *Pparg*, Cluster 2: *Klf4* and Cluster 3: *Tead4*.
- (E) Overview of the differentially H3K27ac-enriched regions in Pre- versus Mature-adipocytes.
- (F) Genomic distribution of the differentially H3K27ac-enriched regions, with regions annotated to TSS within a region of -1kb to +100bp (see Methods)
- (G) GO term associated with genes in the proximity of Pre- and Mature adipocyte H3K27ac enriched regions.

### **Supplementary Figure 3**

(A) Diagnostic scatter plot indicating the correlation between qPCR fold change (FC) versus barcoded mRNA seq FC (relative to Scrambled-I). Pearson's correlation coefficient between the two methods for all the samples is 0.99.

(B) Expression value of all the nodes in the network (Fig 6) and their clustering pattern with respect to *Nfia* knockdown.

(C) Top overrepresented motifs in either Pre- or Mature adipocyte H3K27ac regions containing an NFI peak to detect co-occurring TFs that co-occur with NFIA.

### **Supplementary Figure 4**

(A) Western blot film exposed for 30 seconds (B) and 10 seconds, showing protein expression levels of UCP1, PPAR $\gamma$  (both PPAR $\gamma$ 1 and PPAR $\gamma$ 2 isoforms indicated) and endogenous control  $\alpha$ -TUBULIN at different time points during differentiation, specifically, Day 0, Day 4, and at Day 6 with and without treatment with the  $\beta$ -adrenergic stimulator, isoproterenol. Two biological replicates are shown in the film of which replicate 1 was chosen for the main figure (Fig 1C).

### **Supplementary Table 1**

List of transcription factors and their membership values in the four identified clusters.

### **Supplementary Table 2**

List of motifs enriched in Pre- and Mature-adipocyte specific differentially acetylated regions.

### **Supplementary Table 3**

Motifs of transcription factors identified in the four different clusters and their motif enrichment scores in Pre- and Mature-adipocyte specific differentially acetylated regions.

### **Supplementary Table 4**

List of short hairpin RNAs used for performing loss-of-function assays (from the Sigma library)
